# Supplementary material for: GRK specificity and Gβγ dependency determines the potential of a GPCR for arrestin-biased agonism
Source: PubMed Central journal article supplement (PMC11220067; doi:10.1038/s42003-024-06490-1), 2024-07-03
Supplement: 42003_2024_6490_MOESM2_ESM.pdf [file 42003_2024_6490_MOESM2_ESM.pdf]

# **GRK specificity and G $\beta\gamma$ dependency determines the potential of a GPCR for arrestin-biased agonism**

**Edda S. F. Matthees\*, Jenny C. Filor\*, Natasha Jaiswal, Mona Reichel, Noureldine Youssef, Giulia D'Uonnolo, Martyna Szpakowska, Julia Drube, Gabriele M. König, Evi Kostenis, Andy Chevigné, Amod Godbole, Carsten Hoffmann<sup>1\*\*</sup>**

\* Contributed equally

\*\* Corresponding author: Prof. Dr. Carsten Hoffmann ([carsten.hoffmann@med.uni-jena.de](mailto:carsten.hoffmann@med.uni-jena.de))

## **Supplementary material**

Including Suppl. Fig. 1-9 and Suppl. Tab. 1-14, as well as the respective legends

# Supplementary Figure 1

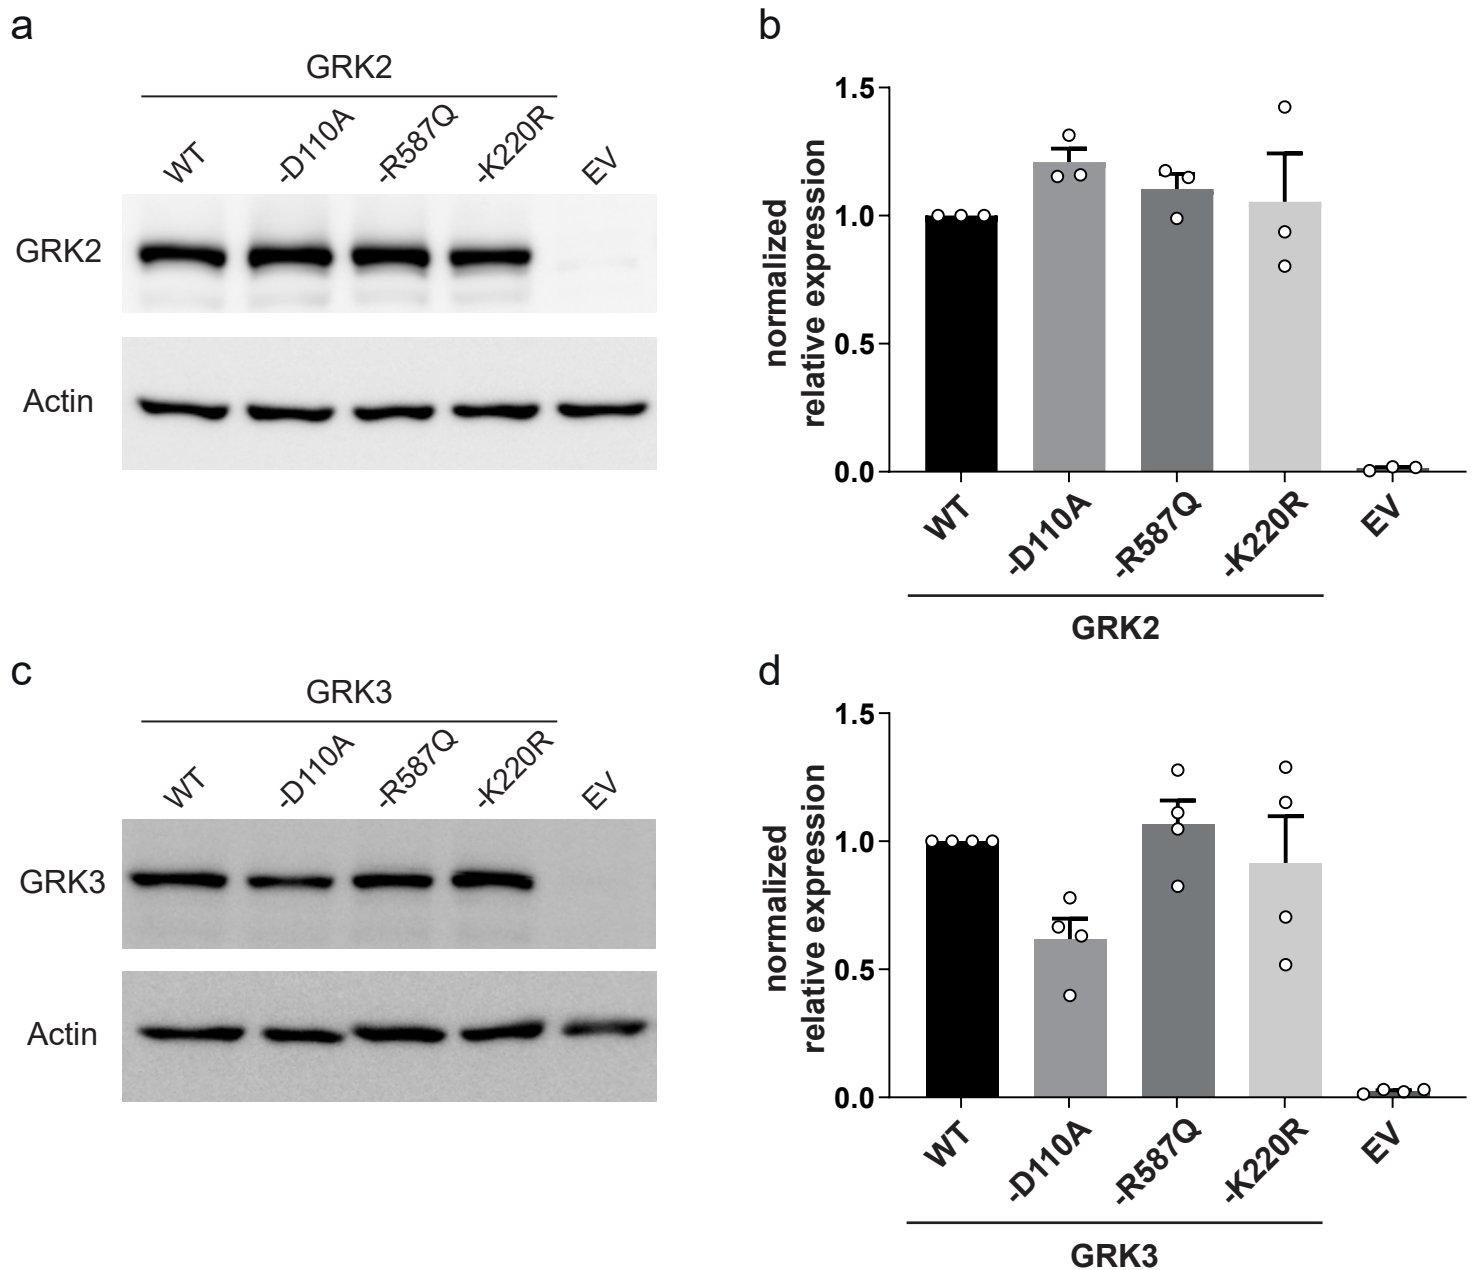

**Supplementary Figure 1: Quantification of GRK2/3 and respective mutant constructs expression.** **a, c**, Representative Western blot of  $n=3$  (GRK2, **a**) or  $n=4$  (GRK3, **c**) independent experiments, showing the overexpression of respective GRK2 or GRK3 versions: WT GRK, GRK-D110A, GRK-R587Q and GRK-K220R, in  $\Delta$ GRK2 (GRK2) or  $\Delta$ GRK2/3 (GRK3) cells, compared to empty vector (EV) in absence of the ubiquitously expressed GRK with actin as loading control. **b, d**, Quantification of the WT GRK, GRK-D110A, GRK-R587Q and GRK-K220R expression levels of GRK2 or GRK3 respectively from **a, c**. Each signal was normalized to the background and actin signal, detected on the same membrane. Relative expression data are shown of  $n=3$  (GRK2) or  $n=4$  (GRK3) independent experiments, respectively normalized to WT GRK2 or GRK3 signal.

# Supplementary Figure 2

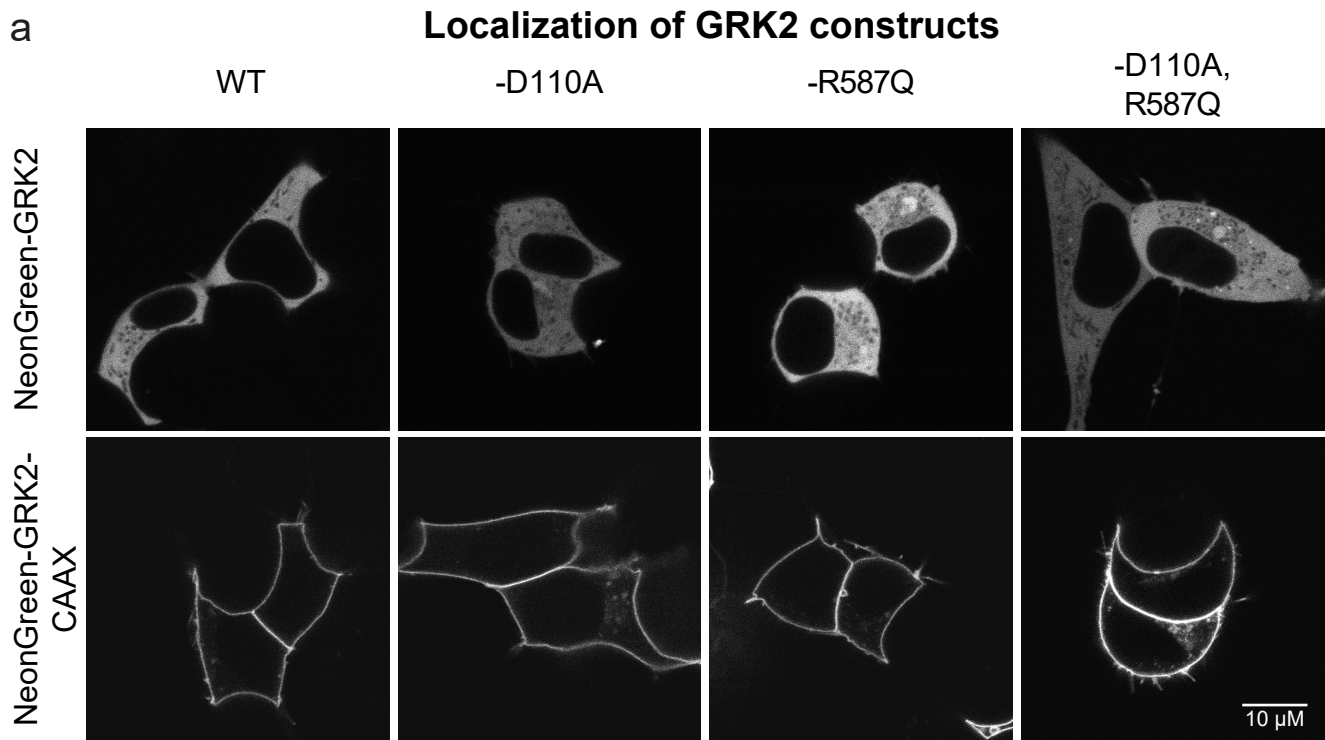

**b** **Fluorescence intensity of GRK2 constructs**

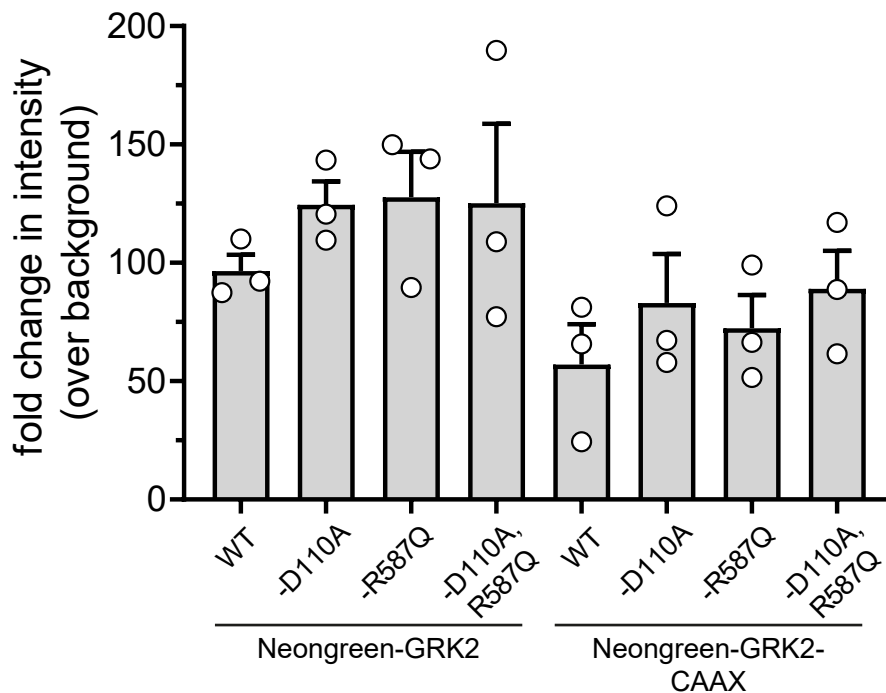

**Suppl. Fig. 2: Confirmation of correct localization and expression of utilized GRK2 and mutant constructs.** **a**,  $\Delta$ Q-GRK cells were transfected with fluorophore-coupled (NeonGreen) GRK2-WT, -D110A, -R587Q, or the double mutant (-D110A, R587Q), as well as the corresponding CAAX-fused versions to ensure the cytosolic or membrane-tethered localization, respectively. Representative confocal images for each utilized GRK2 construct are shown here. **b**, Additionally, fluorescence intensity was measured for all Neongreen-coupled GRK2 constructs. Data are shown as fold change in intensity, normalized to background fluorescence in empty vector (EV)-transfected cells of  $n=3$  independent experiments + SEM. Statistical comparison of all conditions are provided in **Suppl. Tab. 1**.

# Supplementary Figure 3

## b2AR

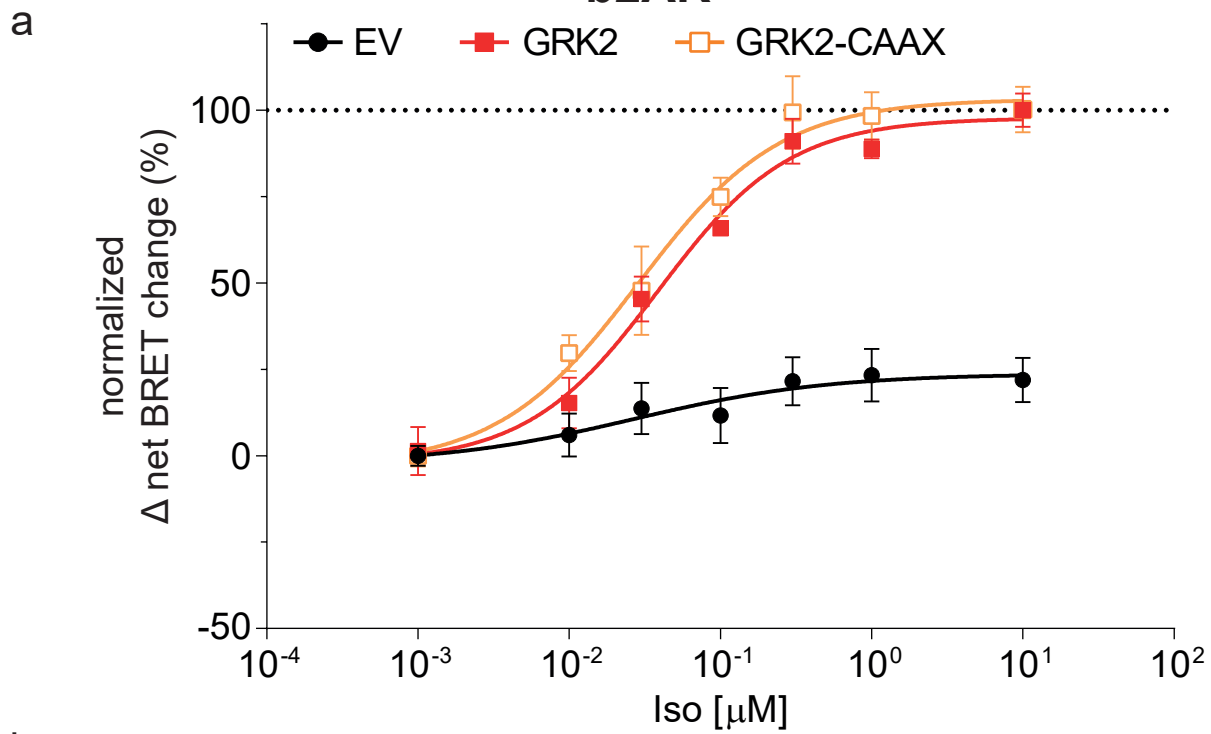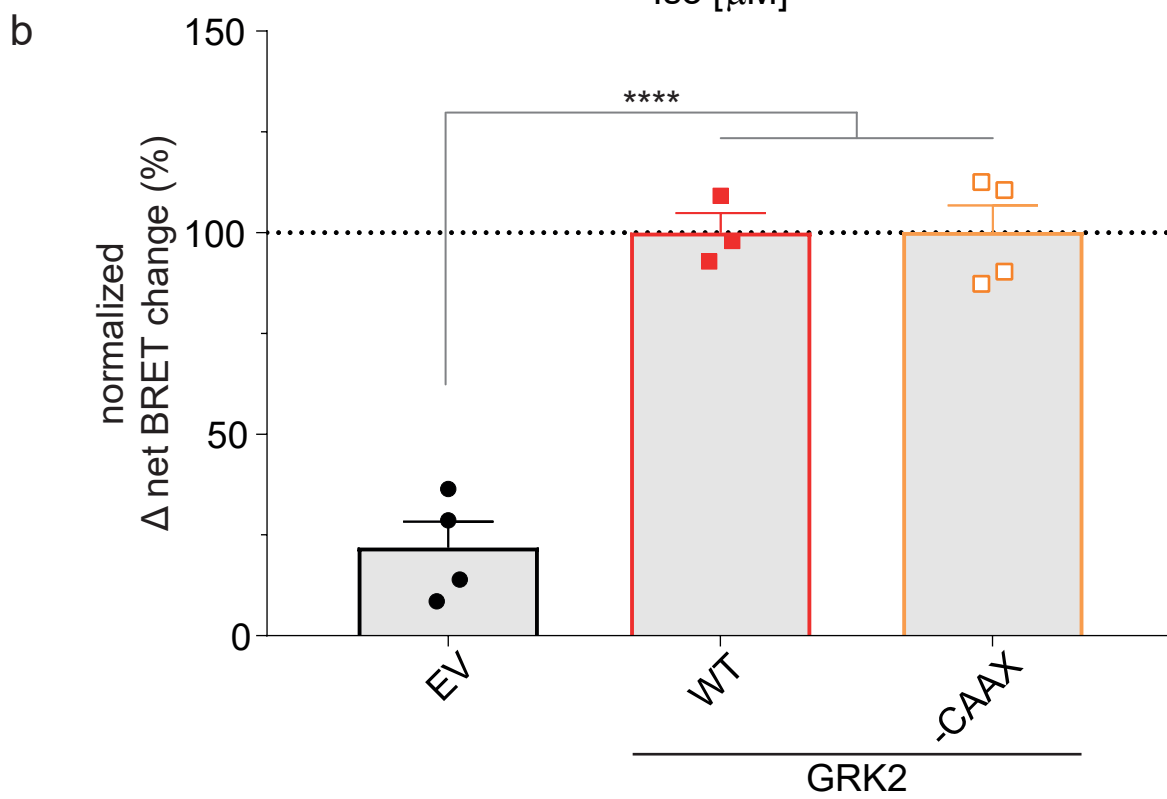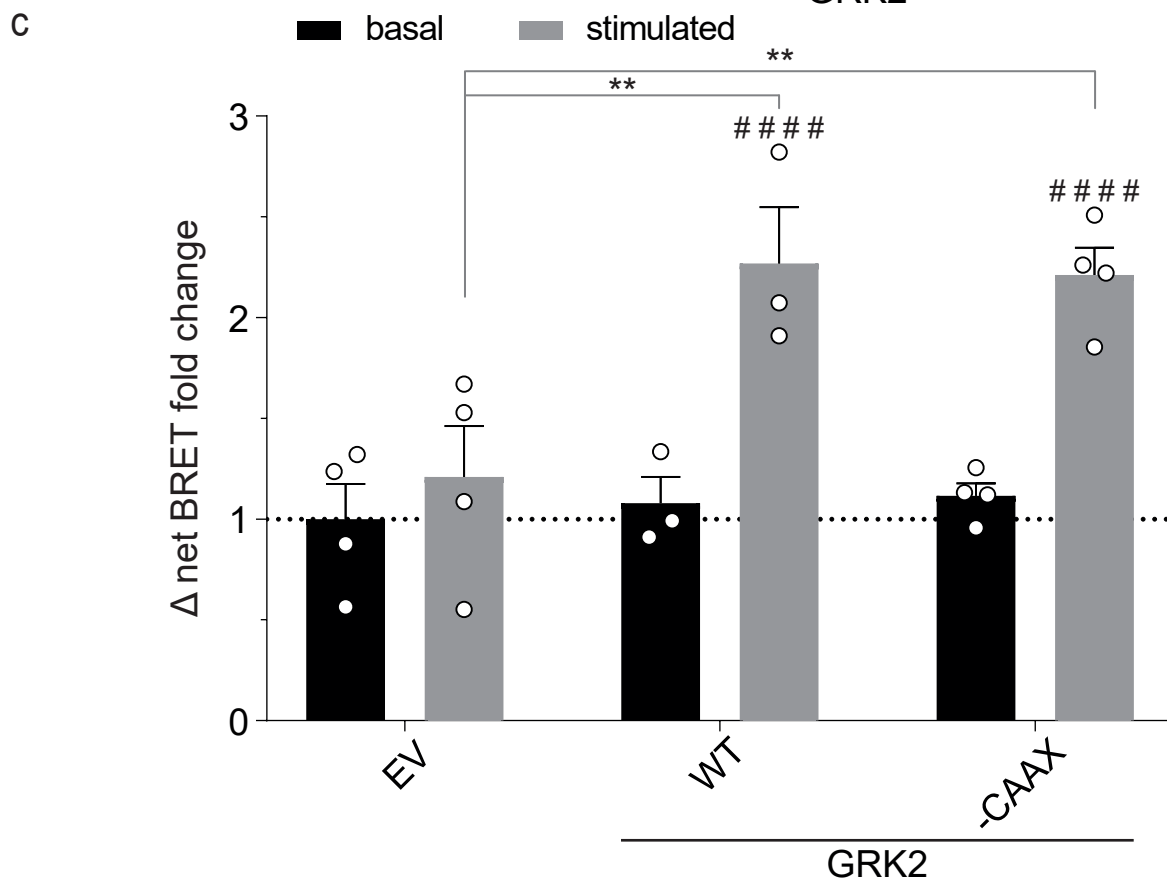

**Suppl. Fig. 3: Comparison of GRK2- and GRK2-CAAX-mediated  $\beta$ -arrestin2 recruitment to the b2AR.** **a**, Iso-induced Halo-Tag- $\beta$ -arrestin2 recruitment to b2AR-NLuc in  $\Delta$ Q-GRK cells in absence of the ubiquitously expressed GRKs (empty vector (EV)-transfected) and in presence of wild type GRK2 or GRK2-CAAX. Data from **Fig. 1** are shown again to allow a direct comparison of the GRK2 and GRK2-CAAX condition. Data are shown as  $\Delta$  net BRET change (%) of at least  $n=3$  independent experiments  $\pm$  SEM, normalized to the maximum response with GRK2. **b**, Normalized BRET data of the highest stimulation of **a** (10  $\mu$ M Iso) are displayed as bar graphs. Statistical differences were tested using one-way ANOVA, followed by a Tukey's test (\*\*\*\*  $p < 0.0001$ ). **c**, The Halo-corrected mean  $\Delta$  net BRET fold changes + SEM of the same dataset (not normalized to the highest stimulated value of the GRK2 WT condition) are presented as bar graphs before (basal) and after stimulation with 10  $\mu$ M Iso (stimulated). The data were normalized to the basal BRET ratio derived from the EV-transfected condition (dotted line). Statistical differences within one condition between basal and stimulated (#) or between the differently transfected conditions (\*) were tested using two-way ANOVA, followed by a Sidak's or Tukey's test respectively (\*\*  $p < 0.01$ ; \*\*\*  $p < 0.001$ ; ####/\*\*\*\*  $p < 0.0001$ ). All detailed statistical results are provided in **Suppl. Tab. 3**.

# Supplementary Figure 4

## M2R

a

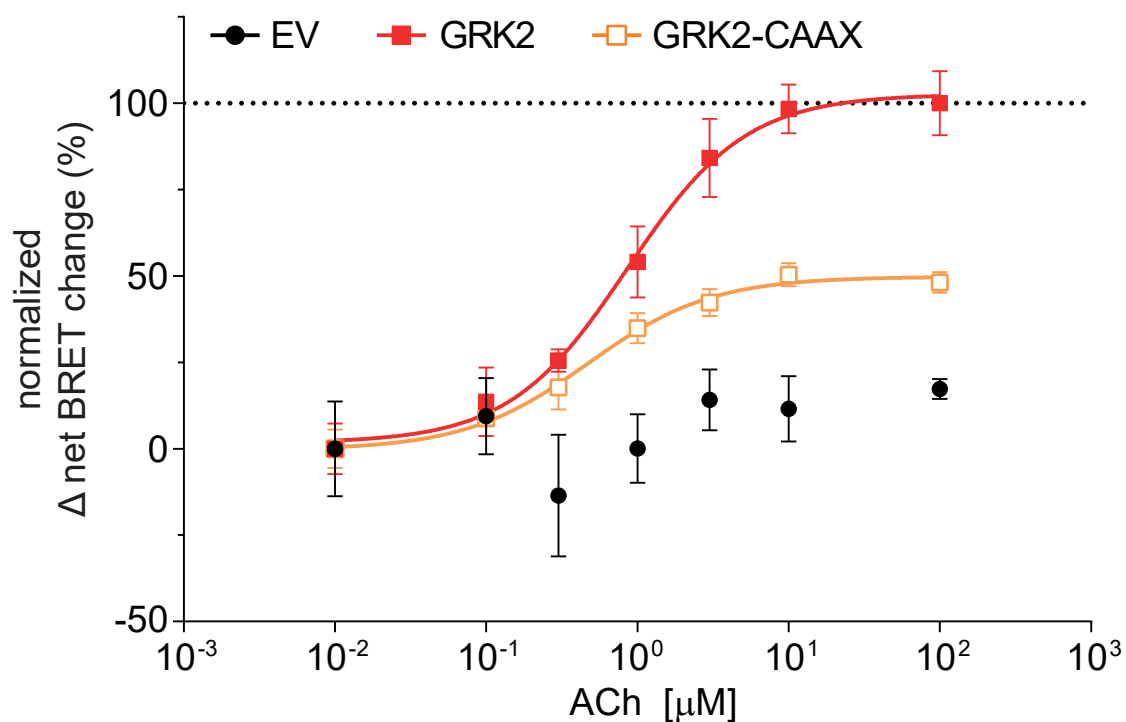

b

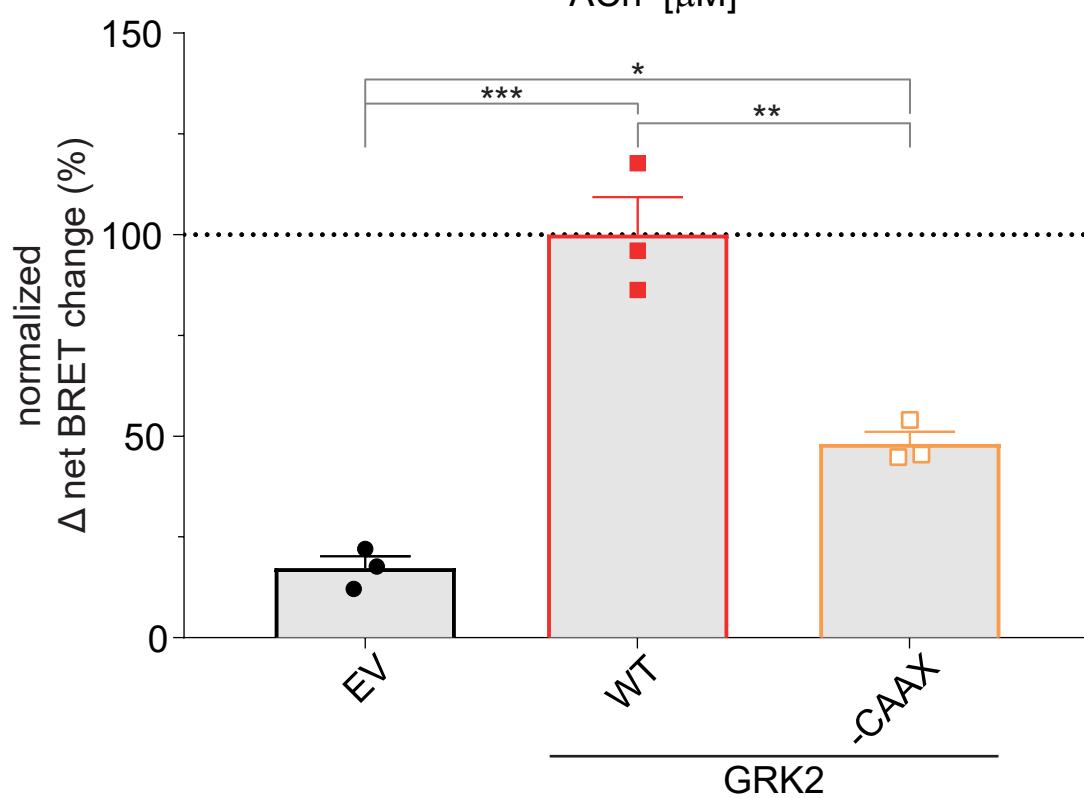

c

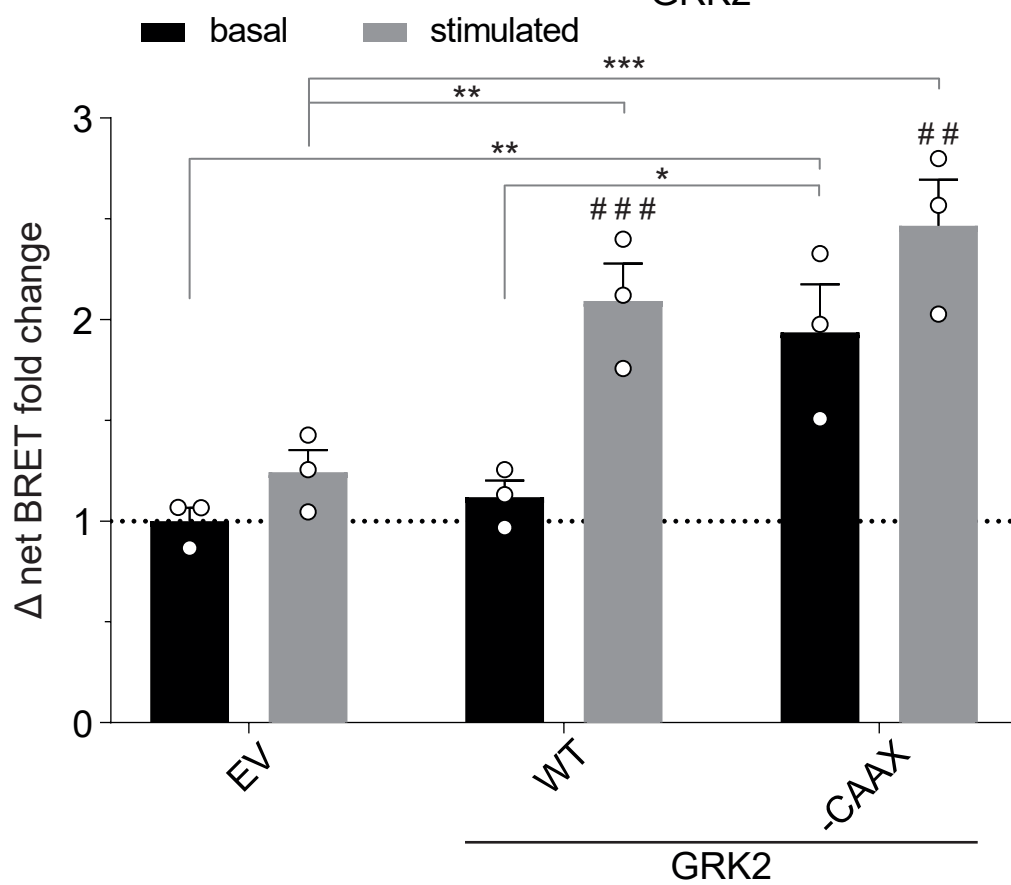

**Suppl. Fig. 4: Comparison of GRK2- and GRK2-CAAX-mediated  $\beta$ -arrestin2 recruitment to the M2R.** **a**, ACh-induced Halo-Tag- $\beta$ -arrestin2 recruitment to M2R-NLuc in  $\Delta$ Q-GRK cells in absence of the ubiquitously expressed GRKs (empty vector (EV)-transfected) and in presence of wild type GRK2 or GRK2-CAAX. The concentration-response curves of the data in **Fig. 2a, b** are shown to allow a direct comparison of the GRK2 and GRK2-CAAX condition. Data are shown as  $\Delta$  net BRET change (%) of  $n=3$  independent experiments  $\pm$  SEM, normalized to the maximum response with GRK2. **b**, Normalized BRET data of the highest stimulation of **a** (100  $\mu$ M ACh) are displayed as bar graphs and statistical differences were tested using one-way ANOVA, followed by a Tukey's test (\*  $p < 0.05$ ; \*\*  $p < 0.01$ ; \*\*\*  $p < 0.001$ ). **c**, The Halo-corrected mean  $\Delta$  net BRET fold changes + SEM of the same dataset (not normalized to the highest stimulated value of the GRK2 WT condition) are presented as bar graphs before (basal) and after stimulation with 100  $\mu$ M ACh (stimulated). The data were normalized to the basal BRET ratio derived from the EV-transfected condition (dotted line). Statistical differences within one condition between basal and stimulated (#) or between the differently transfected conditions (\*) were tested using two-way ANOVA, followed by a Sidak's or Tukey's test respectively (\*  $p < 0.05$ ; ##/\*\*  $p < 0.01$ ; ###/\*\*\*  $p < 0.001$ ; \*\*\*\*  $p < 0.0001$ ). All detailed statistical results are provided in **Suppl. Tab. 5**.

# Supplementary Figure 5

## M5R

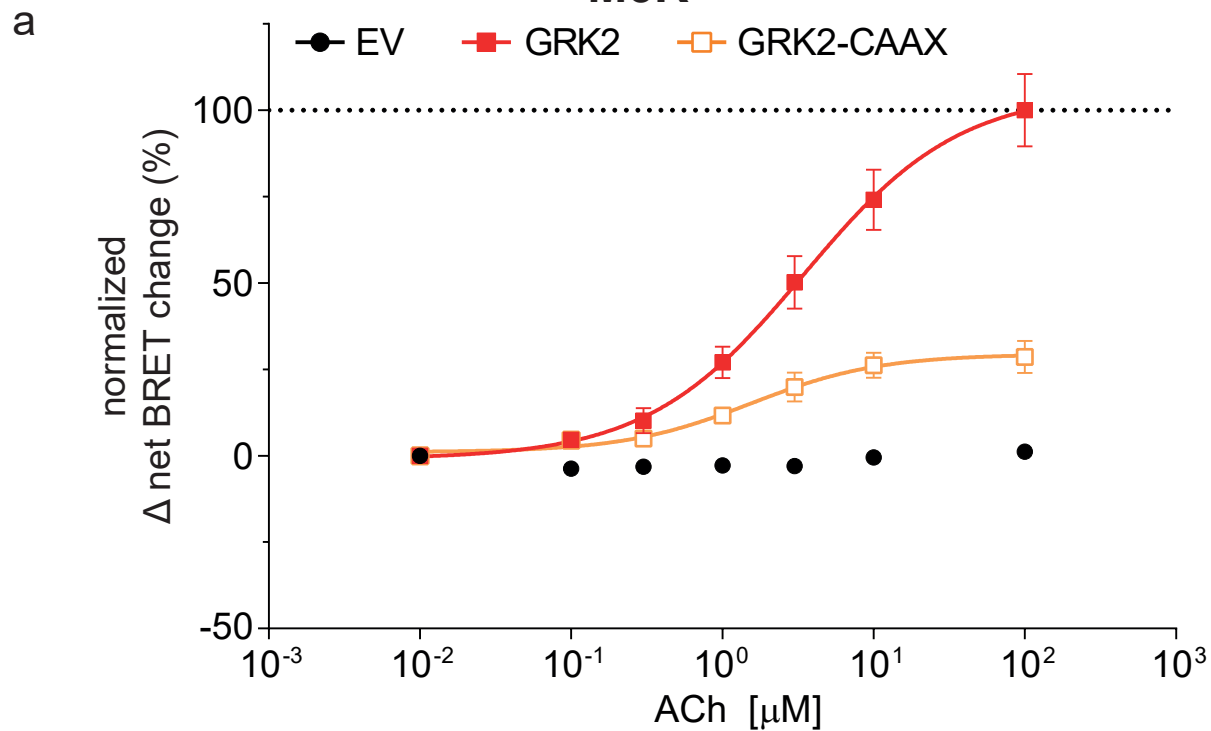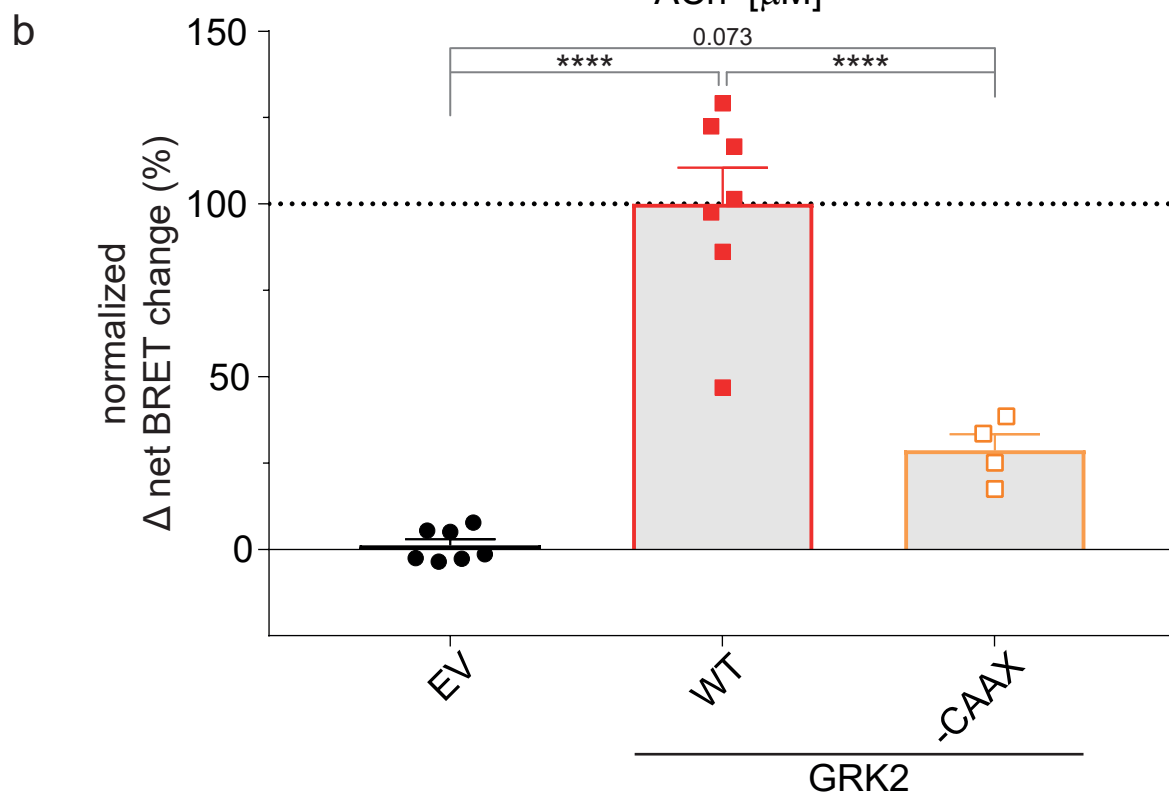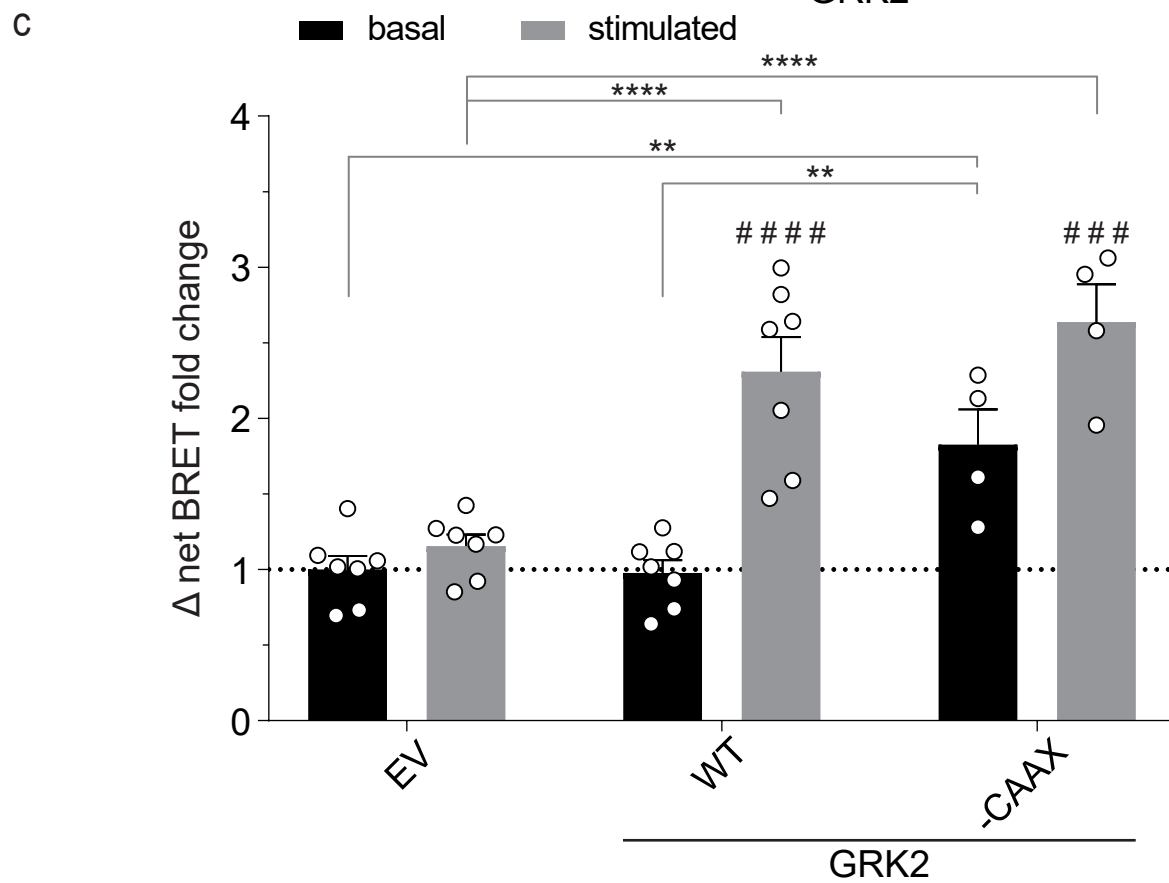



**Suppl. Fig. 5: Comparison of GRK2- and GRK2-CAAX-mediated  $\beta$ -arrestin2 recruitment to the M5R.** **a**, ACh-induced Halo-Tag- $\beta$ -arrestin2 recruitment to M5R-NLuc in  $\Delta$ Q-GRK cells in absence of the ubiquitously expressed GRKs (empty vector (EV)-transfected) and in presence of wild type GRK2 or GRK2-CAAX. The concentration-response curves of the data in **Fig. 2c, d** are shown to allow a direct comparison of the GRK2 and GRK2-CAAX condition. Data are shown as  $\Delta$  net BRET change (%) of  $n=3$  independent experiments  $\pm$  SEM, normalized to the maximum response with GRK2. **b**, Normalized BRET data of the highest stimulation of **a** (100  $\mu$ M ACh) are displayed as bar graphs and statistical differences were tested using one-way ANOVA, followed by a Tukey's test (\*\*\*\*  $p < 0.0001$ ). **c**, The Halo-corrected mean  $\Delta$  net BRET fold changes  $\pm$  SEM of the same dataset (not normalized to the highest stimulated value of the GRK2 WT condition) are presented as bar graphs before (basal) and after stimulation with 100  $\mu$ M ACh (stimulated). The data were normalized to the basal BRET ratio derived from the EV-transfected condition (dotted line). Statistical differences within one condition between basal and stimulated (#) or between the differently transfected conditions (\*) were tested using two-way ANOVA, followed by a Sidak's or Tukey's test respectively (\*\*  $p < 0.01$ ; ###/\*\*\*  $p < 0.001$ ; ####/\*\*\*\*  $p < 0.0001$ ). All detailed statistical results are provided in **Suppl. Tab. 7**.

# Supplementary Figure 6

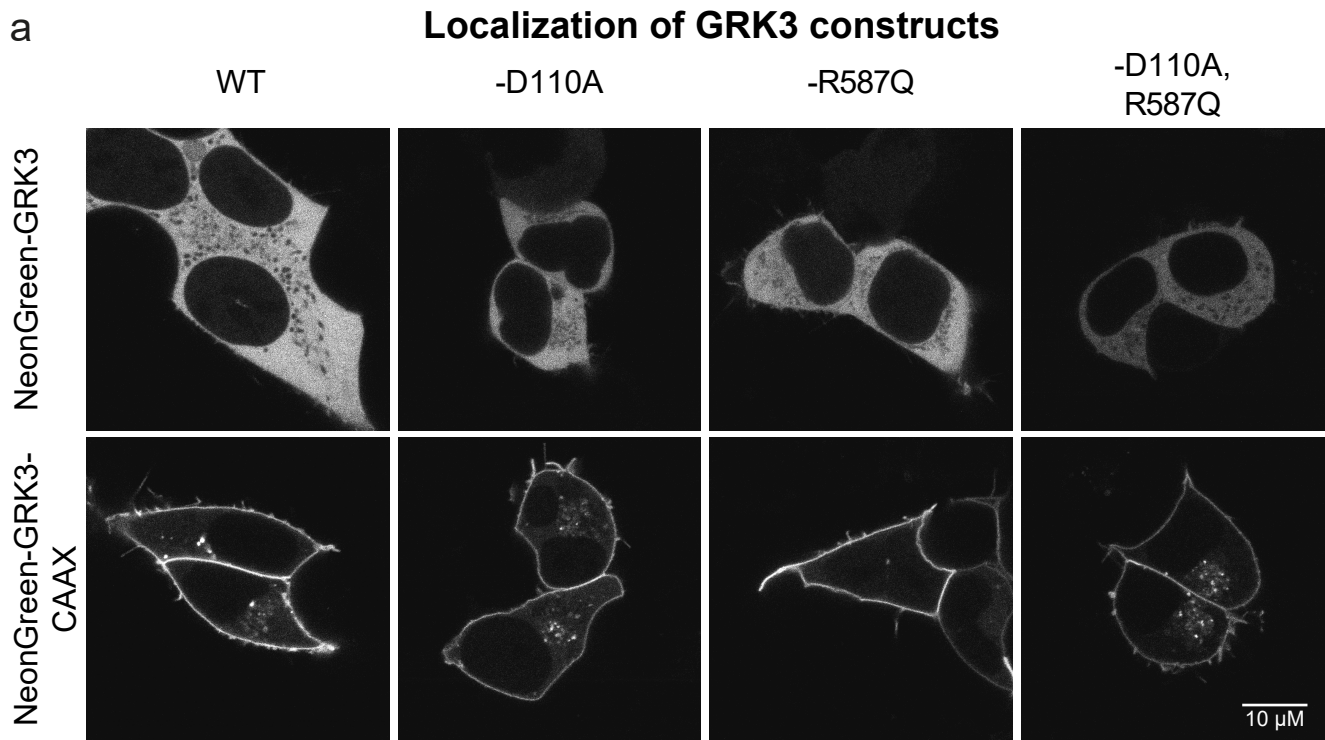

**b** **Fluorescence intensity of GRK3 constructs**

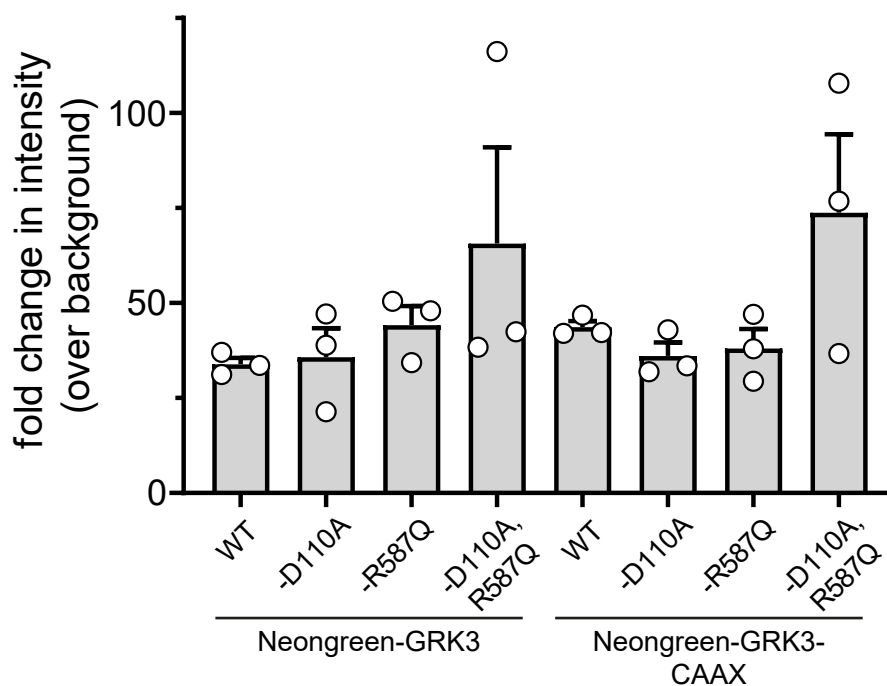

**Suppl. Fig. 6: Confirmation of correct localization and expression of utilized GRK3 and mutant constructs.** **a**, Analogously to GRK2,  $\Delta$ Q-GRK cells were transfected with fluorophore-coupled (NeonGreen) GRK3-WT, -D110A, -R587Q, or the double mutant (-D110A, R587Q), as well as the corresponding CAAX-fused versions to ensure the cytosolic or membrane-tethered localization, respectively. Representative images for each utilized GRK3 construct are shown here. **b**, Fluorescence intensity was measured for all Neongreen-coupled GRK3 constructs. Data are shown as fold change in intensity, normalized to background fluorescence in empty vector-transfected cells, of  $n=3$  independent experiments + SEM. Statistical comparison of all conditions are provided in **Suppl. Tab. 8**.

# Supplementary Figure 7

## b2AR

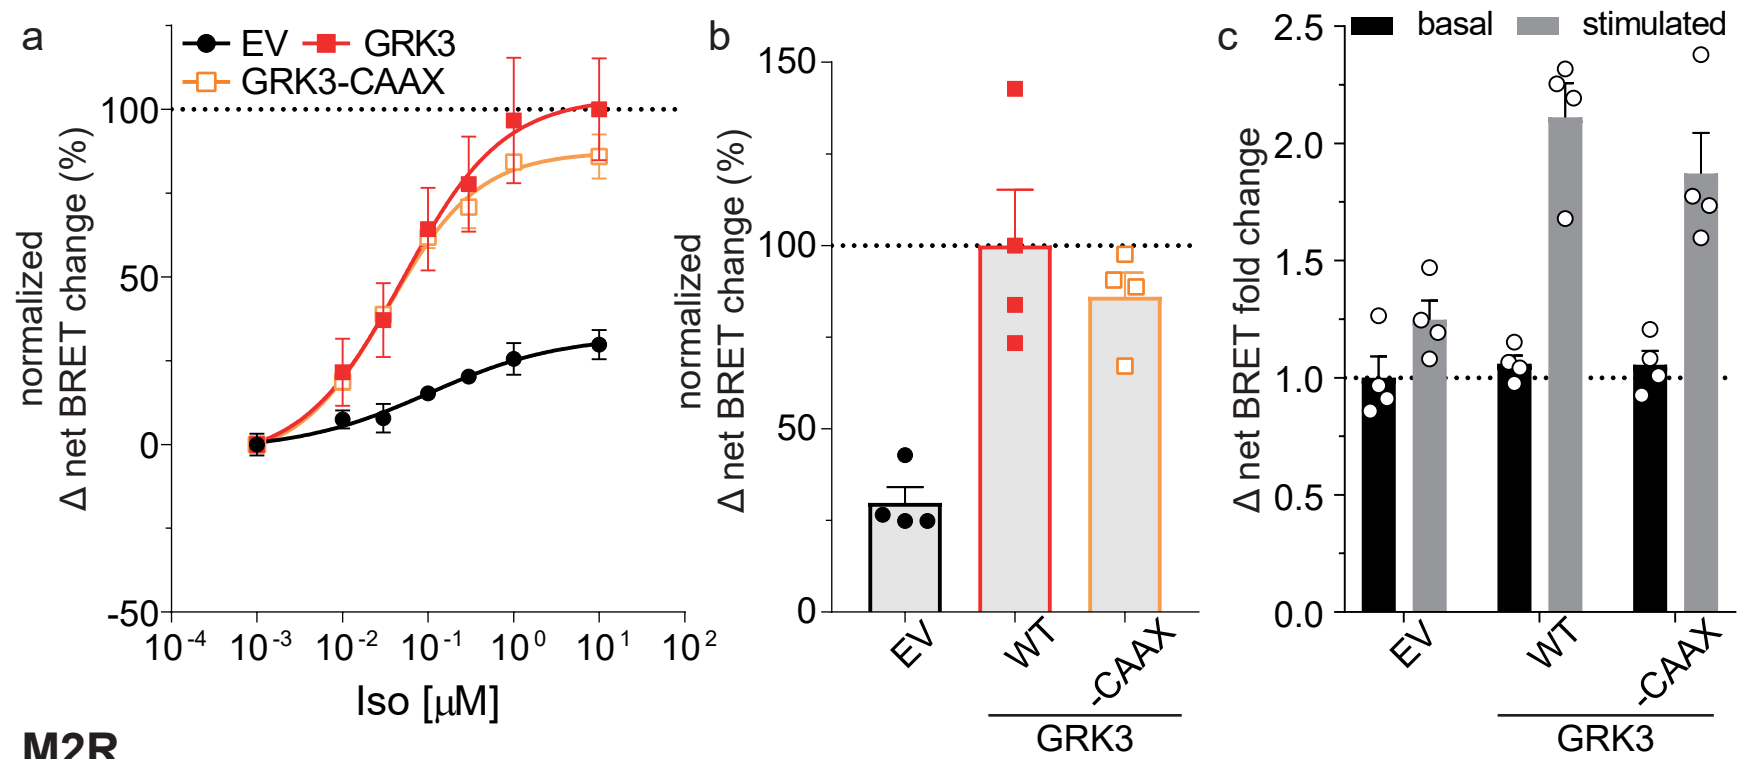

## M2R

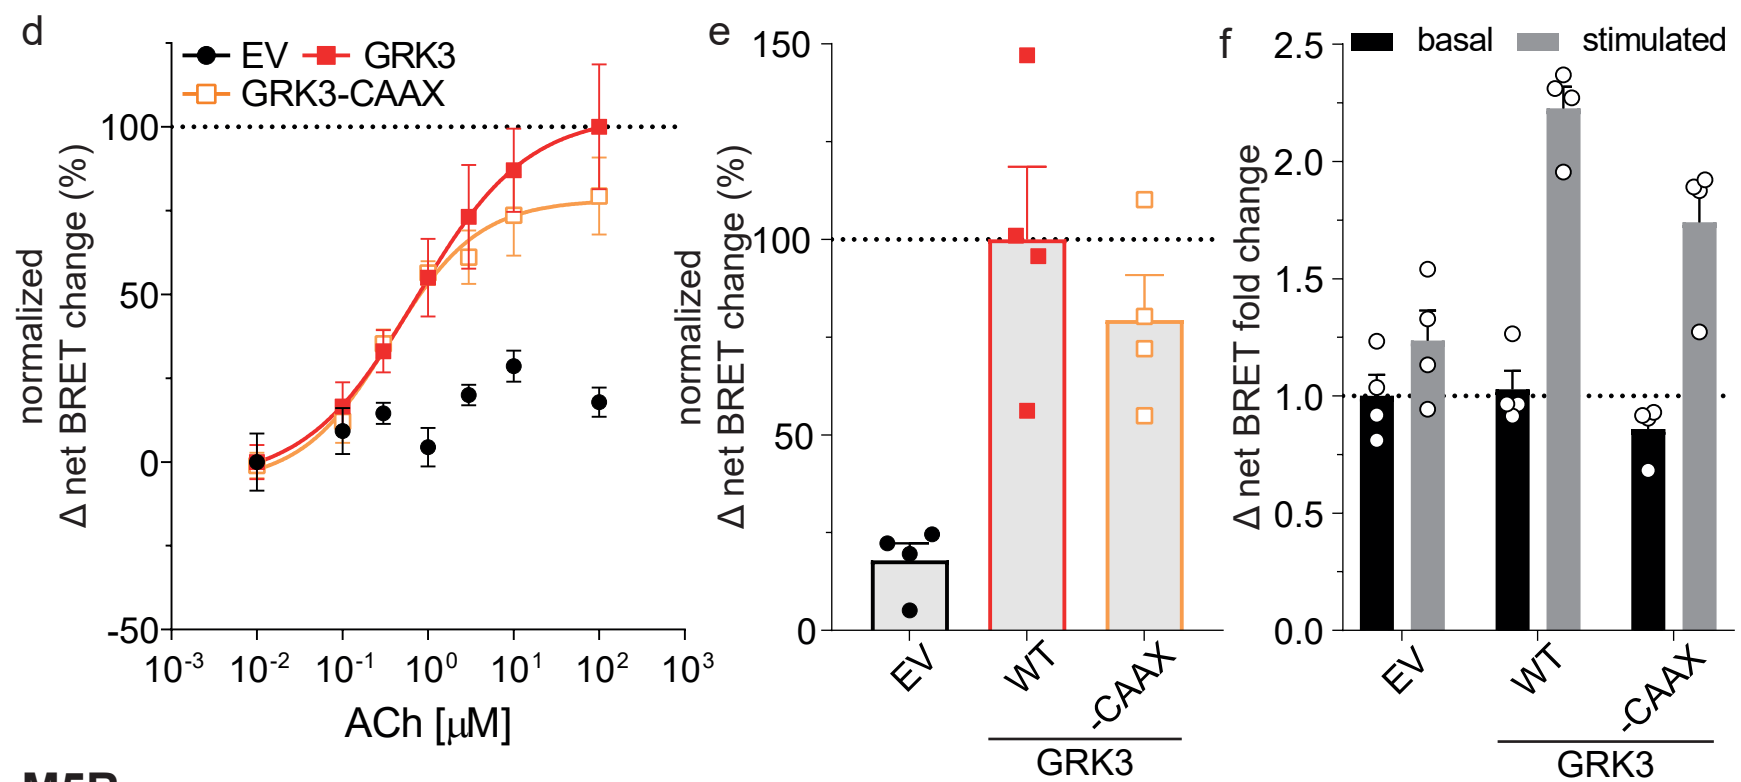

## M5R

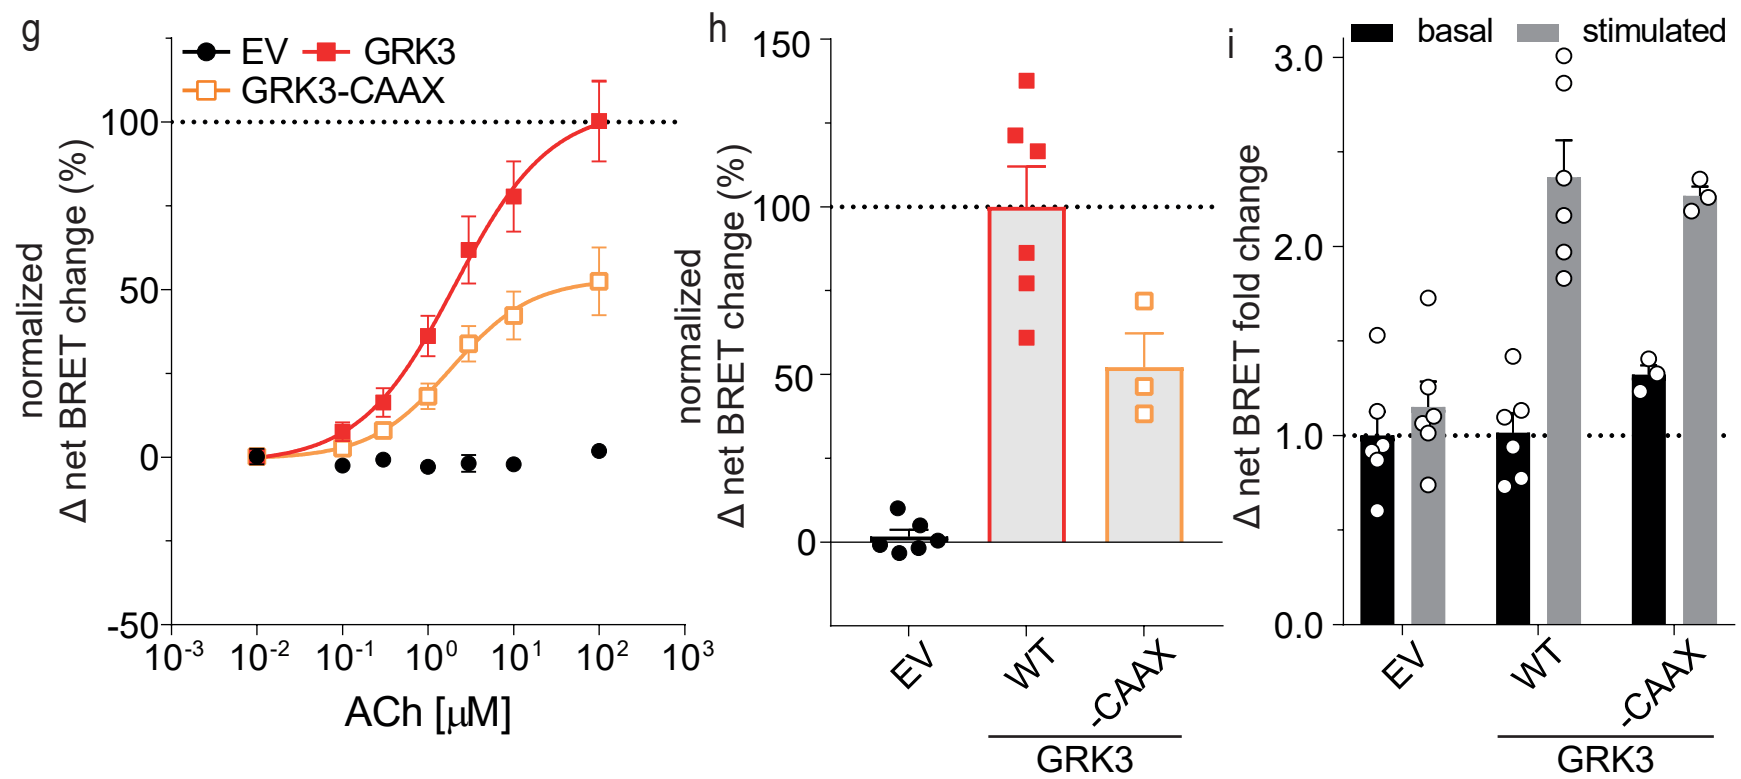

**Suppl. Fig. 7: Comparison of GRK3- and GRK3-CAAX-mediated  $\beta$ -arrestin2 recruitment to the b2AR, M2R and M5R.** **a, d, g**, Agonist-induced Halo-Tag- $\beta$ -arrestin2 recruitment to b2AR-, M2R- or M5R-NLuc in  $\Delta$ Q-GRK cells in absence of the ubiquitously expressed GRKs (empty vector (EV)-transfected) and in presence of wild type GRK3 or GRK3-CAAX. The concentration-response curves of the data in **Fig. 3** are shown to allow a direct comparison of the GRK3 and GRK3-CAAX condition. Data are shown as  $\Delta$  net BRET change (%) of at least  $n=3$  independent experiments  $\pm$  SEM, normalized to the maximum response with GRK3. **b, e, h**, Normalized BRET data of the highest stimulation of **a, d, g** are displayed as bar graphs and statistical differences were tested using one-way ANOVA, followed by a Tukey's test. **c, f, i**, The Halo-corrected mean  $\Delta$  net BRET fold changes  $\pm$  SEM of the same dataset (not normalized to the highest stimulated value of the GRK3 WT condition) are presented as bar graphs before (basal) and after stimulation with 10  $\mu$ M Iso or 100  $\mu$ M ACh (stimulated). The data were normalized to the basal BRET ratio derived from the EV-transfected condition (dotted line). Statistical differences within one condition between basal and stimulated or between the differently transfected conditions were tested using two-way ANOVA, followed by a Sidak's or Tukey's test respectively. All detailed statistical results are provided in **Suppl. Tab. 12**.

# Supplementary Figure 8

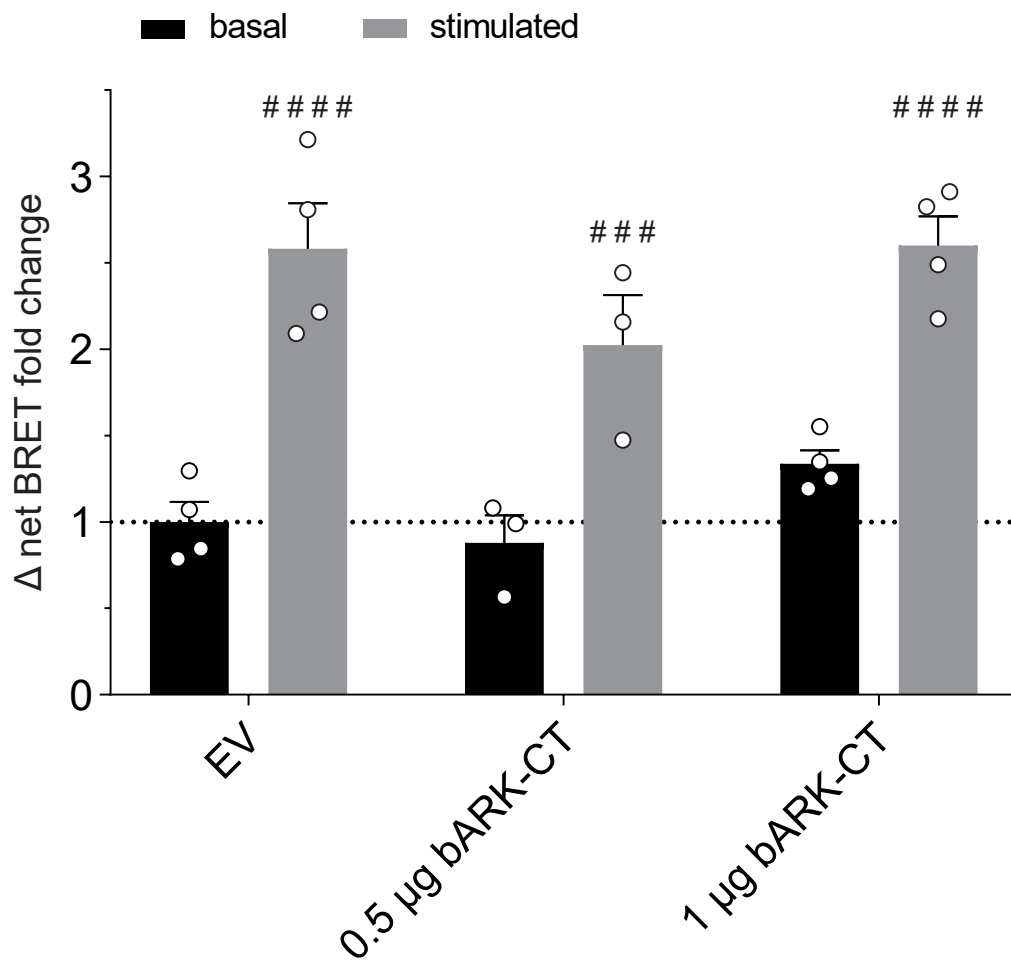

**Suppl. Fig. 8:  $\beta$ -arrestin2 recruitment to the muscarinic M5 acetylcholine receptor (M5R) in the presence of bARK-CT.** The Halo-corrected mean  $\Delta$  net BRET fold changes + SEM of the same dataset as shown in **Fig. 4b** (not normalized to the highest stimulated value of the empty vector (EV) condition) are presented as bar graphs before (basal) and after stimulation with 100  $\mu$ M ACh (stimulated). The data were normalized to the basal BRET ratio derived from the EV-transfected condition (dotted line). Statistical differences within one condition between basal and stimulated (#) or between the differently transfected conditions were tested using two-way ANOVA, followed by a Sidak's or Tukey's test respectively (###  $p < 0.001$ ; ####  $p < 0.0001$ ). All detailed statistical results are provided in **Suppl. Tab. 13**.

# Supplementary Figure 9

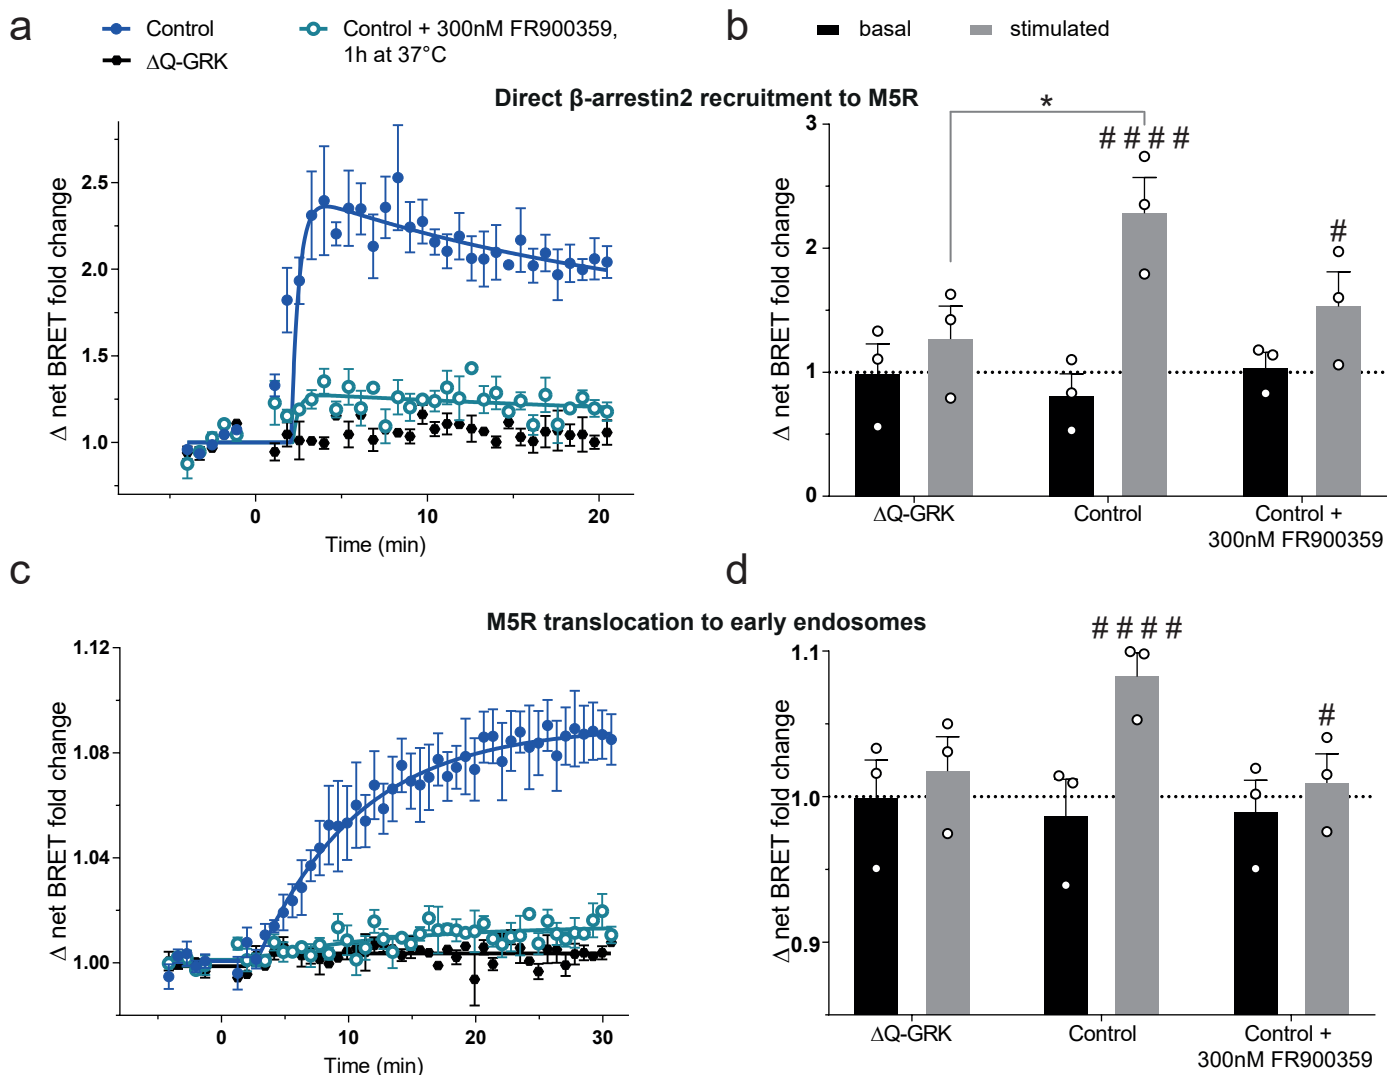

**Suppl. Fig. 9:  $\beta$ -arrestin2 recruitment to the muscarinic M5 acetylcholine receptor (M5R) and M5R translocation to early endosomes in presence of FR900359.** **a**, Halo-Tag- $\beta$ -arrestin2 recruitment to M5R-NLuc was measured in CRISPR/Cas9 HEK293 control cells (Control), expressing all GRKs at endogenous levels, in absence or presence of 300 nM FR900359 or in quadruple GRK2/3/5/6 knockout cells ( $\Delta$ Q-GRK). Dataset of **Fig. 5b** is shown as  $\Delta$  net BRET fold changes over time of  $n=3$  independent experiments  $\pm$  SEM. Ligand (100  $\mu$ M ACh) was added at time point 0 min. **b**, The Halo-corrected mean  $\Delta$  net BRET fold changes + SEM of the same dataset as shown in **Fig. 5b** (not normalized to the highest stimulated value of Control condition) are presented as bar graphs before (basal) and after stimulation with 100  $\mu$ M ACh (stimulated). The data were normalized to the basal BRET ratio derived from the  $\Delta$ Q-GRK condition (dotted line). Statistical differences within one condition between basal and stimulated (#) or between the differently transfected conditions (\*) were tested using two-way ANOVA, followed by a Sidak's or Tukey's test respectively (#/\*  $p < 0.05$ ; #####/\*\*\*\*  $p < 0.0001$ ). **c**, M5R-NLuc translocation to early endosomes (FYVE-Neogreen) as a measure of internalization was assessed in Control cells in absence or presence of 300 nM FR900359 or in  $\Delta$ Q-GRK cells. Dataset of **Fig. 5d** is shown as  $\Delta$  net BRET fold changes over time of  $n=3$  independent experiments  $\pm$  SEM. Ligand (100  $\mu$ M ACh) was added at time point 0 min. **d**, The mean  $\Delta$  net BRET fold changes + SEM of the same dataset as shown in **Fig. 5d** (not normalized to the highest stimulated value of Control condition) are presented as bar graphs before (basal) and after stimulation with 100  $\mu$ M ACh (stimulated). Normalization and statistical analysis was performed as described above. All detailed statistical results are provided in **Suppl. Tab. 14**.

**Supplementary Table 1:** Detailed statistical results of the analysis of the fold change in intensity (over background) in the fluorescence intensity measurements of NeonGreen-coupled GRK2 constructs are shown as presented in **Supplementary Figure 2b**. The fold change in intensity of each condition were compared using one-way ANOVA, followed by a Tukey's test (*ns* not significant; \*  $p < 0.05$ ; \*\*  $p < 0.01$ ; \*\*\*  $p < 0.001$ ; \*\*\*\*  $p < 0.0001$ ). For each condition the mean difference, 95% confidence interval (CI) of the difference, and the adjusted  $p$  value are shown.

| conditions                          | mean diff. | 95% CI of diff. | adjusted $p$ value |
|-------------------------------------|------------|-----------------|--------------------|
| GRK2 vs. GRK2-D110A                 | -27.93     | -119.6 to 63.74 | 0.9576 ns          |
| GRK2 vs. GRK2-R587Q                 | -31.2      | -122.9 to 60.48 | 0.9271 ns          |
| GRK2 vs. GRK2-DM                    | -28.75     | -120.4 to 62.92 | 0.9509 ns          |
| GRK2 vs. GRK2-CAAX                  | 39.43      | -52.24 to 131.1 | 0.8024 ns          |
| GRK2 vs. GRK2-D110A-CAAX            | 13.48      | -78.19 to 105.2 | 0.9994 ns          |
| GRK2 vs. GRK2-R587Q-CAAX            | 24.2       | -67.47 to 115.9 | 0.9801 ns          |
| GRK2 vs. GRK2-DM-CAAX               | 7.433      | -84.24 to 99.11 | >0.9999 ns         |
| GRK2-D110A vs. GRK2-R587Q           | -3.268     | -94.94 to 88.40 | >0.9999 ns         |
| GRK2-D110A vs. GRK2-DM              | -0.819     | -92.49 to 90.85 | >0.9999 ns         |
| GRK2-D110A vs. GRK2-CAAX            | 67.36      | -24.31 to 159.0 | 0.2454 ns          |
| GRK2-D110A vs. GRK2-D110A-CAAX      | 41.41      | -50.26 to 133.1 | 0.7637 ns          |
| GRK2-D110A vs. GRK2-R587Q-CAAX      | 52.13      | -39.54 to 143.8 | 0.5289 ns          |
| GRK2-D110A vs. GRK2-DM-CAAX         | 35.36      | -56.31 to 127.0 | 0.8722 ns          |
| GRK2-R587Q vs. GRK2-DM              | 2.449      | -89.22 to 94.12 | >0.9999 ns         |
| GRK2-R587Q vs. GRK2-CAAX            | 70.63      | -21.05 to 162.3 | 0.2022 ns          |
| GRK2-R587Q vs. GRK2-D110A-CAAX      | 44.68      | -47.00 to 136.3 | 0.6949 ns          |
| GRK2-R587Q vs. GRK2-R587Q-CAAX      | 55.4       | -36.28 to 147.1 | 0.4584 ns          |
| GRK2-R587Q vs. GRK2-DM-CAAX         | 38.63      | -53.04 to 130.3 | 0.8173 ns          |
| GRK2-DM vs. GRK2-CAAX               | 68.18      | -23.49 to 159.8 | 0.234 ns           |
| GRK2-DM vs. GRK2-D110A-CAAX         | 42.23      | -49.44 to 133.9 | 0.747 ns           |
| GRK2-DM vs. GRK2-R587Q-CAAX         | 52.95      | -38.72 to 144.6 | 0.5109 ns          |
| GRK2-DM vs. GRK2-DM-CAAX            | 36.18      | -55.49 to 127.9 | 0.8594 ns          |
| GRK2-CAAX vs. GRK2-D110A-CAAX       | -25.95     | -117.6 to 65.72 | 0.9711 ns          |
| GRK2-CAAX vs. GRK2-R587Q-CAAX       | -15.23     | -106.9 to 76.44 | 0.9988 ns          |
| GRK2-CAAX vs. GRK2-DM-CAAX          | -32        | -123.7 to 59.68 | 0.9179 ns          |
| GRK2-D110A-CAAX vs. GRK2-R587Q-CAAX | 10.72      | -80.95 to 102.4 | 0.9999 ns          |
| GRK2-D110A-CAAX vs. GRK2-DM-CAAX    | -6.047     | -97.72 to 85.63 | >0.9999 ns         |
| GRK2-R587Q-CAAX vs. GRK2-DM-CAAX    | -16.77     | -108.4 to 74.91 | 0.9977 ns          |

**Supplementary Table 2:** Detailed statistical results of the analysis of the  $\Delta$  net BRET change in  $\beta$ -arrestin2 recruitment to b2AR, mediated by the indicated GRK construct in  $\Delta$ Q-GRK cells, are shown as presented in **Figure 1h, i**. The  $\Delta$  net BRET changes at 10  $\mu$ M Isoprenaline (Iso) of each condition were compared using one-way ANOVA, followed by a Tukey's test (*ns* not significant; \*  $p < 0.05$ ; \*\*  $p < 0.01$ ; \*\*\*  $p < 0.001$ ; \*\*\*\*  $p < 0.0001$ ). For each condition the mean difference, 95% confidence interval (CI) of the difference, and the adjusted  $p$  value are shown.

| conditions                                | mean diff. | 95% CI of diff.  | adjusted $p$ value |
|-------------------------------------------|------------|------------------|--------------------|
| EV vs. GRK2                               | -78.11     | -106 to -50.18   | <0.0001 ****       |
| EV vs. GRK2-D110A                         | -82.49     | -110.4 to -54.57 | <0.0001 ****       |
| EV vs. GRK2-R587Q                         | -9.005     | -34.86 to 16.85  | 0.8052 ns          |
| EV vs. GRK2-D110A,R587Q                   | -9.693     | -35.55 to 16.16  | 0.762 ns           |
| GRK2 vs. GRK2-D110A                       | -4.386     | -34.24 to 25.47  | 0.9895 ns          |
| GRK2 vs. GRK2-R587Q                       | 69.1       | 41.18 to 97.03   | <0.0001 ****       |
| GRK2 vs. GRK2-D110A,R587Q                 | 68.41      | 40.49 to 96.34   | <0.0001 ****       |
| GRK2-D110A vs. GRK2-R587Q                 | 73.49      | 45.56 to 101.4   | <0.0001 ****       |
| GRK2-D110A vs. GRK2-D110A,R587Q           | 72.8       | 44.87 to 100.7   | <0.0001 ****       |
| GRK2-R587Q vs. GRK2-D110A,R587Q           | -0.6872    | -26.54 to 25.17  | >0.9999 ns         |
|                                           |            |                  |                    |
| EV vs. GRK2-CAAX                          | -78.15     | -108.8 to -47.54 | <0.0001 ****       |
| EV vs. GRK2-D110A-CAAX                    | -75.07     | -105.7 to -44.46 | <0.0001 ****       |
| EV vs. GRK2-R587Q-CAAX                    | -60.52     | -91.13 to -29.92 | 0.0002 ***         |
| EV vs. GRK2-D110A,R587Q-CAAX              | -62.7      | -93.31 to -32.1  | 0.0001 ***         |
| GRK2-CAAX vs. GRK2-D110A-CAAX             | 3.08       | -27.53 to 33.69  | 0.9977 ns          |
| GRK2-CAAX vs. GRK2-R587Q-CAAX             | 17.62      | -12.98 to 48.23  | 0.4204 ns          |
| GRK2-CAAX vs. GRK2-D110A,R587Q-CAAX       | 15.45      | -15.16 to 46.05  | 0.5434 ns          |
| GRK2-D110A-CAAX vs. GRK2-R587Q-CAAX       | 14.54      | -16.06 to 45.15  | 0.597 ns           |
| GRK2-D110A-CAAX vs. GRK2-D110A,R587Q-CAAX | 12.37      | -18.24 to 42.97  | 0.7249 ns          |
| GRK2-R587Q-CAAX vs. GRK2-D110A,R587Q-CAAX | -2.177     | -32.78 to 28.43  | 0.9994 ns          |



**Supplementary Table 3:** Detailed statistical results of the analysis of the  $\Delta$  net BRET change in  $\beta$ -arrestin2 recruitment to b2AR, mediated by the indicated GRK2 construct in  $\Delta$ Q-GRK cells, are shown as presented in **Supplementary Figure 3b, c**. The  $\Delta$  net BRET changes at 10  $\mu$ M Isoprenaline (Iso) of each condition were compared using one-way ANOVA, followed by a Tukey's test (*ns* not significant; \*  $p < 0.05$ ; \*\*  $p < 0.01$ ; \*\*\*  $p < 0.001$ ; \*\*\*\*  $p < 0.0001$ ). The non-normalized, Halo-corrected mean  $\Delta$  net BRET fold changes before (basal) and after stimulation with 10  $\mu$ M Iso (stimulated) were compared between the conditions or within one condition, as indicated. Statistical analysis was performed by two-way ANOVA, followed by a Tukey's or Sidak's test respectively (*ns* not significant; \*  $p < 0.05$ ; \*\*  $p < 0.01$ ; \*\*\*  $p < 0.001$ ; \*\*\*\*  $p < 0.0001$ ). For each condition the mean difference, 95% confidence interval (CI) of the difference, and the adjusted  $p$  value are shown.

Statistical details of Suppl. Fig. 3b

| conditions         | mean diff. | 95% CI of diff.  | adjusted $p$ value |
|--------------------|------------|------------------|--------------------|
| EV vs. GRK2        | -78.11     | -104.4 to -51.81 | <0.0001 ****       |
| EV vs. GRK2 CAAX   | -78.3      | -102.6 to -53.95 | <0.0001 ****       |
| GRK2 vs. GRK2 CAAX | -0.1926    | -26.49 to 26.11  | 0.9998 ns          |

Statistical details of Suppl. Fig. 3c

comparison of basal and stimulated between conditions

| basal              | mean diff. | 95% CI of diff.   | adjusted $p$ value |
|--------------------|------------|-------------------|--------------------|
| EV vs. GRK2        | -0.07946   | -0.7695 to 0.6106 | 0.9527 ns          |
| EV vs. GRK2 CAAX   | -0.1161    | -0.755 to 0.5227  | 0.8866 ns          |
| GRK2 vs. GRK2 CAAX | -0.03669   | -0.7268 to 0.6534 | 0.9897 ns          |

| stimulated         | mean diff. | 95% CI of diff.   | adjusted $p$ value |
|--------------------|------------|-------------------|--------------------|
| EV vs. GRK2        | -1.058     | -1.749 to -0.3684 | 0.0031 **          |
| EV vs. GRK2 CAAX   | -1.002     | -1.641 to -0.3627 | 0.0026 **          |
| GRK2 vs. GRK2 CAAX | 0.05685    | -0.6332 to 0.7469 | 0.9754 ns          |

comparison of basal vs. stimulated within one condition

| conditions | mean diff. | 95% CI of diff.   | adjusted $p$ value |
|------------|------------|-------------------|--------------------|
| EV         | -0.2095    | -0.5687 to 0.1498 | 0.3136 ns          |
| GRK2       | -1.188     | -1.603 to -0.7737 | <0.0001 ****       |
| GRK2 CAAX  | -1.095     | -1.454 to -0.7357 | <0.0001 ****       |

**Supplementary Table 4:** Detailed statistical results of the analysis of the  $\Delta$  net BRET change in  $\beta$ -arrestin2 recruitment to M2R, mediated by the indicated GRK construct in  $\Delta$ Q-GRK cells, are shown as presented in **Figure 2a, b**. The  $\Delta$  net BRET changes at 100  $\mu$ M Acetylcholine (ACh) of each condition were compared using one-way ANOVA, followed by a Tukey's test (*ns* not significant; \*  $p < 0.05$ ; \*\*  $p < 0.01$ ; \*\*\*  $p < 0.001$ ). For each condition the mean difference, 95% confidence interval (CI) of the difference, and the adjusted  $p$  value are shown.

| conditions                                | mean diff. | 95% CI of diff.  | adjusted $p$ value |
|-------------------------------------------|------------|------------------|--------------------|
| EV vs. GRK2                               | -82.71     | -116 to -49.41   | <0.0001 ****       |
| EV vs. GRK2-D110A                         | -103.9     | -137.2 to -70.63 | <0.0001 ****       |
| EV vs. GRK2-R587Q                         | -6.587     | -39.89 to 26.72  | 0.9626 ns          |
| EV vs. GRK2-D110A,R587Q                   | -31.28     | -64.59 to 2.019  | 0.0681 ns          |
| GRK2 vs. GRK2-D110A                       | -21.22     | -54.52 to 12.09  | 0.2924 ns          |
| GRK2 vs. GRK2-R587Q                       | 76.13      | 42.82 to 109.4   | 0.0002 ***         |
| GRK2 vs. GRK2-D110A,R587Q                 | 51.43      | 18.13 to 84.73   | 0.0034 **          |
| GRK2-D110A vs. GRK2-R587Q                 | 97.34      | 64.04 to 130.6   | <0.0001 ****       |
| GRK2-D110A vs. GRK2-D110A,R587Q           | 72.65      | 39.34 to 105.9   | 0.0002 ***         |
| GRK2-R587Q vs. GRK2-D110A,R587Q           | -24.7      | -58 to 8.606     | 0.1814 ns          |
|                                           |            |                  |                    |
| EV vs. GRK2-CAAX                          | -64.07     | -116.7 to -11.43 | 0.0166 *           |
| EV vs. GRK2-D110A-CAAX                    | -63.34     | -116 to -10.7    | 0.0178 *           |
| EV vs. GRK2-R587Q-CAAX                    | -59.71     | -112.4 to -7.066 | 0.0252 *           |
| EV vs. GRK2-D110A,R587Q-CAAX              | -113.8     | -166.4 to -61.16 | 0.0002 ***         |
| GRK2-CAAX vs. GRK2-D110A-CAAX             | 0.7327     | -51.91 to 53.37  | >0.9999 ns         |
| GRK2-CAAX vs. GRK2-R587Q-CAAX             | 4.362      | -48.28 to 57     | 0.9986 ns          |
| GRK2-CAAX vs. GRK2-D110A,R587Q-CAAX       | -49.73     | -102.4 to 2.915  | 0.0663 ns          |
| GRK2-D110A-CAAX vs. GRK2-R587Q-CAAX       | 3.629      | -49.01 to 56.27  | 0.9993 ns          |
| GRK2-D110A-CAAX vs. GRK2-D110A,R587Q-CAAX | -50.46     | -103.1 to 2.183  | 0.0618 ns          |
| GRK2-R587Q-CAAX vs. GRK2-D110A,R587Q-CAAX | -54.09     | -106.7 to -1.447 | 0.0434 *           |

**Supplementary Table 5:** Detailed statistical results of the analysis of the  $\Delta$  net BRET change in  $\beta$ -arrestin2 recruitment to M2R, mediated by the indicated GRK2 construct in  $\Delta$ Q-GRK cells, are shown as presented in **Supplementary Figure 4b, c**. The  $\Delta$  net BRET changes at 100  $\mu$ M ACh of each condition were compared using one-way ANOVA, followed by a Tukey's test (*ns* not significant; \*  $p < 0.05$ ; \*\*  $p < 0.01$ ; \*\*\*  $p < 0.001$ ; \*\*\*\*  $p < 0.0001$ ). The non-normalized, Halo-corrected mean  $\Delta$  net BRET fold changes before (basal) and after stimulation with 100  $\mu$ M ACh (stimulated) were compared between the conditions or within one condition, as indicated. Statistical analysis was performed by two-way ANOVA, followed by a Tukey's or Sidak's test respectively (*ns* not significant; \*  $p < 0.05$ ; \*\*  $p < 0.01$ ; \*\*\*  $p < 0.001$ ; \*\*\*\*  $p < 0.0001$ ). For each condition the mean difference, 95% confidence interval (CI) of the difference, and the adjusted  $p$  value are shown.

Statistical details of Suppl. Fig. 4b

| conditions         | mean diff. | 95% CI of diff.  | adjusted $p$ value |
|--------------------|------------|------------------|--------------------|
| EV vs. GRK2        | -82.71     | -108.2 to -57.24 | 0.0001 ***         |
| EV vs. GRK2 CAAX   | -30.83     | -56.3 to -5.353  | 0.0232 *           |
| GRK2 vs. GRK2 CAAX | 51.89      | 26.42 to 77.36   | 0.0019 **          |

Statistical details of Suppl. Fig. 4c

comparison of basal and stimulated between conditions

| basal              | mean diff. | 95% CI of diff.   | adjusted $p$ value |
|--------------------|------------|-------------------|--------------------|
| EV vs. GRK2        | -0.1183    | -0.7474 to 0.5108 | 0.8719 ns          |
| EV vs. GRK2 CAAX   | -0.9371    | -1.566 to -0.308  | 0.0049 **          |
| GRK2 vs. GRK2 CAAX | -0.8188    | -1.448 to -0.1897 | 0.0119 *           |

| stimulated         | mean diff. | 95% CI of diff.   | adjusted $p$ value |
|--------------------|------------|-------------------|--------------------|
| EV vs. GRK2        | -0.8504    | -1.48 to -0.2213  | 0.0093 **          |
| EV vs. GRK2 CAAX   | -1.223     | -1.852 to -0.5937 | 0.0006 ***         |
| GRK2 vs. GRK2 CAAX | -0.3724    | -1.001 to 0.2567  | 0.2915 ns          |

comparison of basal vs. stimulated within one condition

| conditions | mean diff. | 95% CI of diff.    | adjusted $p$ value |
|------------|------------|--------------------|--------------------|
| EV         | -0.2422    | -0.551 to 0.06652  | 0.1219 ns          |
| GRK2       | -0.9743    | -1.283 to -0.6656  | 0.0001 ***         |
| GRK2 CAAX  | -0.528     | -0.8367 to -0.2192 | 0.0041 **          |

**Supplementary Table 6:** Detailed statistical results of the analysis of the  $\Delta$  net BRET change in  $\beta$ -arrestin2 recruitment to M5R, mediated by the indicated GRK2 construct in  $\Delta$ Q-GRK cells, are shown as presented in **Figure 2c, d**. The  $\Delta$  net BRET changes at 100  $\mu$ M ACh of each condition were compared using one-way ANOVA, followed by a Tukey's test (*ns* not significant; \*  $p < 0.05$ ; \*\*  $p < 0.01$ ; \*\*\*  $p < 0.001$ ; \*\*\*\*  $p < 0.0001$ ). For each condition the mean difference, 95% confidence interval (CI) of the difference, and the adjusted  $p$  value are shown.

| conditions                                | mean diff. | 95% CI of diff.  | adjusted $p$ value |
|-------------------------------------------|------------|------------------|--------------------|
| EV vs. GRK2                               | -98.85     | -128.9 to -68.81 | <0.0001 ****       |
| EV vs. GRK2-D110A                         | -87.82     | -119.1 to -56.56 | <0.0001 ****       |
| EV vs. GRK2-R587Q                         | -41.19     | -72.45 to -9.923 | 0.0055 **          |
| EV vs. GRK2-D110A,R587Q                   | -19.88     | -51.14 to 11.39  | 0.3637 ns          |
| GRK2 vs. GRK2-D110A                       | 11.03      | -20.24 to 42.29  | 0.8392 ns          |
| GRK2 vs. GRK2-R587Q                       | 57.66      | 26.4 to 88.93    | <0.0001 ****       |
| GRK2 vs. GRK2-D110A,R587Q                 | 78.97      | 47.71 to 110.2   | <0.0001 ****       |
| GRK2-D110A vs. GRK2-R587Q                 | 46.64      | 14.19 to 79.08   | 0.0022 **          |
| GRK2-D110A vs. GRK2-D110A,R587Q           | 67.95      | 35.5 to 100.4    | <0.0001 ****       |
| GRK2-R587Q vs. GRK2-D110A,R587Q           | 21.31      | -11.13 to 53.75  | 0.3322 ns          |
|                                           |            |                  |                    |
| EV vs. GRK2-CAAX                          | -95.98     | -165.3 to -26.7  | 0.0046 **          |
| EV vs. GRK2-D110A-CAAX                    | -112.7     | -189 to -36.41   | 0.0026 **          |
| EV vs. GRK2-R587Q-CAAX                    | -107.4     | -176.6 to -38.07 | 0.0016 **          |
| EV vs. GRK2-D110A,R587Q-CAAX              | -113.3     | -182.6 to -44.05 | 0.001 ***          |
| GRK2-CAAX vs. GRK2-D110A-CAAX             | -16.71     | -101.1 to 67.72  | 0.9728 ns          |
| GRK2-CAAX vs. GRK2-R587Q-CAAX             | -11.37     | -89.53 to 66.79  | 0.9913 ns          |
| GRK2-CAAX vs. GRK2-D110A,R587Q-CAAX       | -17.36     | -95.52 to 60.81  | 0.9591 ns          |
| GRK2-D110A-CAAX vs. GRK2-R587Q-CAAX       | 5.336      | -79.09 to 89.76  | 0.9997 ns          |
| GRK2-D110A-CAAX vs. GRK2-D110A,R587Q-CAAX | -0.6486    | -85.07 to 83.77  | >0.9999 ns         |
| GRK2-R587Q-CAAX vs. GRK2-D110A,R587Q-CAAX | -5.985     | -84.15 to 72.18  | 0.9993 ns          |

**Supplementary Table 7:** Detailed statistical results of the analysis of the  $\Delta$  net BRET change in  $\beta$ -arrestin2 recruitment to M5R, mediated by the indicated GRK2 construct in  $\Delta$ Q-GRK cells, are shown as presented in **Supplementary Figure 5b, c**. The  $\Delta$  net BRET changes at 100  $\mu$ M ACh of each condition were compared using one-way ANOVA, followed by a Tukey's test (*ns* not significant; \*  $p < 0.05$ ; \*\*  $p < 0.01$ ; \*\*\*  $p < 0.001$ ; \*\*\*\*  $p < 0.0001$ ). The non-normalized, Halo-corrected mean  $\Delta$  net BRET fold changes before (basal) and after stimulation with 100  $\mu$ M ACh (stimulated) were compared between the conditions or within one condition, as indicated. Statistical analysis was performed by two-way ANOVA, followed by a Tukey's or Sidak's test respectively (*ns* not significant; \*  $p < 0.05$ ; \*\*  $p < 0.01$ ; \*\*\*  $p < 0.001$ ; \*\*\*\*  $p < 0.0001$ ). For each condition the mean difference, 95% confidence interval (CI) of the difference, and the adjusted  $p$  value are shown.

Statistical details of Suppl. Fig. 5b

| conditions         | mean diff. | 95% CI of diff.  | adjusted $p$ value |
|--------------------|------------|------------------|--------------------|
| EV vs. GRK2        | -98.85     | -124.3 to -73.39 | <0.0001 ****       |
| EV vs. GRK2 CAAX   | -27.49     | -57.34 to 2.361  | 0.0733 ns          |
| GRK2 vs. GRK2 CAAX | 71.36      | 41.51 to 101.2   | <0.0001 ****       |

Statistical details of Suppl. Fig. 5c

comparison of basal and stimulated between conditions

| basal              | mean diff. | 95% CI of diff.   | adjusted $p$ value |
|--------------------|------------|-------------------|--------------------|
| EV vs. GRK2        | 0.02301    | -0.4865 to 0.5325 | 0.9932 ns          |
| EV vs. GRK2 CAAX   | -0.8273    | -1.425 to -0.2298 | 0.0051 **          |
| GRK2 vs. GRK2 CAAX | -0.8503    | -1.448 to -0.2528 | 0.004 **           |

| stimulated         | mean diff. | 95% CI of diff.   | adjusted $p$ value |
|--------------------|------------|-------------------|--------------------|
| EV vs. GRK2        | -1.152     | -1.662 to -0.6429 | <0.0001 ****       |
| EV vs. GRK2 CAAX   | -1.481     | -2.079 to -0.8839 | <0.0001 ****       |
| GRK2 vs. GRK2 CAAX | -0.329     | -0.9264 to 0.2685 | 0.3755 ns          |

comparison of basal vs. stimulated within one condition

| conditions | mean diff. | 95% CI of diff.   | adjusted $p$ value |
|------------|------------|-------------------|--------------------|
| EV         | -0.1559    | -0.4621 to 0.1503 | 0.472 ns           |
| GRK2       | -1.331     | -1.638 to -1.025  | <0.0001 ****       |
| GRK2 CAAX  | -0.81      | -1.215 to -0.4049 | 0.0002 ***         |

**Supplementary Table 8:** Detailed statistical results of the analysis of the fold change in intensity (over background) in the fluorescence intensity measurements of NeonGreen-coupled GRK3 constructs are shown as presented in **Supplementary Figure 6b**. The fold change in intensity of each condition were compared using one-way ANOVA, followed by a Tukey's test (*ns* not significant; \*  $p < 0.05$ ; \*\*  $p < 0.01$ ; \*\*\*  $p < 0.001$ ; \*\*\*\*  $p < 0.0001$ ). For each condition the mean difference, 95% confidence interval (CI) of the difference, and the adjusted  $p$  value are shown.

| conditions                          | mean diff. | 95% CI of diff. | adjusted $p$ value |
|-------------------------------------|------------|-----------------|--------------------|
| GRK3 vs. GRK3-D110A                 | -1.871     | -61.59 to 57.84 | >0.9999 ns         |
| GRK3 vs. GRK3-R587Q                 | -10.34     | -70.05 to 49.38 | 0.9984 ns          |
| GRK3 vs. GRK3-DM                    | -31.79     | -91.50 to 27.93 | 0.6032 ns          |
| GRK3 vs. GRK3-CAAX                  | -9.774     | -69.49 to 49.94 | 0.9989 ns          |
| GRK3 vs. GRK3-D110A-CAAX            | -2.213     | -61.93 to 57.50 | >0.9999 ns         |
| GRK3 vs. GRK3-R587Q-CAAX            | -4.191     | -63.91 to 55.52 | >0.9999 ns         |
| GRK3 vs. GRK3-DM-CAAX               | -39.89     | -99.60 to 19.83 | 0.3441 ns          |
| GRK3-D110A vs. GRK3-R587Q           | -8.464     | -68.18 to 51.25 | 0.9996 ns          |
| GRK3-D110A vs. GRK3-DM              | -29.92     | -89.63 to 29.80 | 0.6674 ns          |
| GRK3-D110A vs. GRK3-CAAX            | -7.903     | -67.62 to 51.81 | 0.9997 ns          |
| GRK3-D110A vs. GRK3-D110A-CAAX      | -0.3417    | -60.06 to 59.37 | >0.9999 ns         |
| GRK3-D110A vs. GRK3-R587Q-CAAX      | -2.32      | -62.03 to 57.40 | >0.9999 ns         |
| GRK3-D110A vs. GRK3-DM-CAAX         | -38.02     | -97.73 to 21.70 | 0.3982 ns          |
| GRK3-R587Q vs. GRK3-DM              | -21.45     | -81.17 to 38.26 | 0.9063 ns          |
| GRK3-R587Q vs. GRK3-CAAX            | 0.5616     | -59.15 to 60.28 | >0.9999 ns         |
| GRK3-R587Q vs. GRK3-D110A-CAAX      | 8.122      | -51.59 to 67.84 | 0.9997 ns          |
| GRK3-R587Q vs. GRK3-R587Q-CAAX      | 6.144      | -53.57 to 65.86 | >0.9999 ns         |
| GRK3-R587Q vs. GRK3-DM-CAAX         | -29.55     | -89.27 to 30.16 | 0.6798 ns          |
| GRK3-DM vs. GRK3-CAAX               | 22.02      | -37.70 to 81.73 | 0.8949 ns          |
| GRK3-DM vs. GRK3-D110A-CAAX         | 29.58      | -30.14 to 89.29 | 0.6789 ns          |
| GRK3-DM vs. GRK3-R587Q-CAAX         | 27.6       | -32.12 to 87.31 | 0.7441 ns          |
| GRK3-DM vs. GRK3-DM-CAAX            | -8.097     | -67.81 to 51.62 | 0.9997 ns          |
| GRK3-CAAX vs. GRK3-D110A-CAAX       | 7.561      | -52.15 to 67.28 | 0.9998 ns          |
| GRK3-CAAX vs. GRK3-R587Q-CAAX       | 5.583      | -54.13 to 65.30 | >0.9999 ns         |
| GRK3-CAAX vs. GRK3-DM-CAAX          | -30.11     | -89.83 to 29.60 | 0.6607 ns          |
| GRK3-D110A-CAAX vs. GRK3-R587Q-CAAX | -1.978     | -61.69 to 57.74 | >0.9999 ns         |
| GRK3-D110A-CAAX vs. GRK3-DM-CAAX    | -37.67     | -97.39 to 22.04 | 0.4085 ns          |
| GRK3-R587Q-CAAX vs. GRK3-DM-CAAX    | -35.7      | -95.41 to 24.02 | 0.471 ns           |

**Supplementary Table 9:** Detailed statistical results of the analysis of the  $\Delta$  net BRET change in  $\beta$ -arrestin2 recruitment to b2AR, mediated by the indicated GRK3 construct in  $\Delta$ Q-GRK cells, are shown as presented in **Figure 3a, b**. The  $\Delta$  net BRET changes at 10  $\mu$ M Iso of each condition were compared using one-way ANOVA, followed by a Tukey's test (*ns* not significant; \*  $p < 0.05$ ; \*\*  $p < 0.01$ ; \*\*\*  $p < 0.001$ ; \*\*\*\*  $p < 0.0001$ ). For each condition the mean difference, 95% confidence interval (CI) of the difference, and the adjusted  $p$  value are shown.

| conditions                                | mean diff. | 95% CI of diff.  | adjusted $p$ value |
|-------------------------------------------|------------|------------------|--------------------|
| EV vs. GRK3                               | -70.23     | -115.2 to -25.21 | 0.002 **           |
| EV vs. GRK3-D110A                         | -64.53     | -113.1 to -15.9  | 0.0075 **          |
| EV vs. GRK3-R587Q                         | 0.298      | -44.72 to 45.31  | >0.9999 ns         |
| EV vs. GRK3-D110A,R587Q                   | 4.095      | -40.92 to 49.11  | 0.9984 ns          |
| GRK3 vs. GRK3-D110A                       | 5.7        | -42.92 to 54.32  | 0.9957 ns          |
| GRK3 vs. GRK3-R587Q                       | 70.52      | 25.51 to 115.5   | 0.0019 **          |
| GRK3 vs. GRK3-D110A,R587Q                 | 74.32      | 29.31 to 119.3   | 0.0012 **          |
| GRK3-D110A vs. GRK3-R587Q                 | 64.82      | 16.2 to 113.4    | 0.0073 **          |
| GRK3-D110A vs. GRK3-D110A,R587Q           | 68.62      | 20 to 117.2      | 0.0046 **          |
| GRK3-R587Q vs. GRK3-D110A,R587Q           | 3.797      | -41.22 to 48.81  | 0.9988 ns          |
|                                           |            |                  |                    |
| EV vs. GRK3-CAAX                          | -65.39     | -91.19 to -39.58 | <0.0001 ****       |
| EV vs. GRK3-D110A-CAAX                    | -50.44     | -76.24 to -24.63 | 0.0002 ***         |
| EV vs. GRK3-R587Q-CAAX                    | -40.91     | -68.78 to -13.03 | 0.0033 **          |
| EV vs. GRK3-D110A,R587Q-CAAX              | -17.57     | -43.37 to 8.24   | 0.2649 ns          |
| GRK3-CAAX vs. GRK3-D110A-CAAX             | 14.95      | -10.86 to 40.75  | 0.4085 ns          |
| GRK3-CAAX vs. GRK3-R587Q-CAAX             | 24.48      | -3.393 to 52.35  | 0.098 ns           |
| GRK3-CAAX vs. GRK3-D110A,R587Q-CAAX       | 47.82      | 22.02 to 73.63   | 0.0004 ***         |
| GRK3-D110A-CAAX vs. GRK3-R587Q-CAAX       | 9.531      | -18.34 to 37.4   | 0.8207 ns          |
| GRK3-D110A-CAAX vs. GRK3-D110A,R587Q-CAAX | 32.87      | 7.067 to 58.68   | 0.0103 *           |
| GRK3-R587Q-CAAX vs. GRK3-D110A,R587Q-CAAX | 23.34      | -4.531 to 51.21  | 0.1219 ns          |

**Supplementary Table 10:** Detailed statistical results of the analysis of the  $\Delta$  net BRET change in  $\beta$ -arrestin2 recruitment to M2R, mediated by the indicated GRK3 construct in  $\Delta$ Q-GRK cells, are shown as presented in **Figure 3c, d**. The  $\Delta$  net BRET changes at 100  $\mu$ M ACh of each condition were compared using one-way ANOVA, followed by a Tukey's test (*ns* not significant; \*  $p < 0.05$ ; \*\*  $p < 0.01$ ; \*\*\*  $p < 0.001$ ; \*\*\*\*  $p < 0.0001$ ). For each condition the mean difference, 95% confidence interval (CI) of the difference, and the adjusted  $p$  value are shown.

| conditions                                | mean diff. | 95% CI of diff.  | adjusted $p$ value |
|-------------------------------------------|------------|------------------|--------------------|
| EV vs. GRK3                               | -82.13     | -133.2 to -31.1  | 0.0015 **          |
| EV vs. GRK3-D110A                         | -62.4      | -113.4 to -11.37 | 0.0138 *           |
| EV vs. GRK3-R587Q                         | 11.8       | -39.23 to 62.84  | 0.9482 ns          |
| EV vs. GRK3-D110A,R587Q                   | -13.03     | -68.15 to 42.09  | 0.9441 ns          |
| GRK3 vs. GRK3-D110A                       | 19.74      | -31.29 to 70.77  | 0.7487 ns          |
| GRK3 vs. GRK3-R587Q                       | 93.94      | 42.91 to 145     | 0.0004 ***         |
| GRK3 vs. GRK3-D110A,R587Q                 | 69.1       | 13.98 to 124.2   | 0.0116 *           |
| GRK3-D110A vs. GRK3-R587Q                 | 74.2       | 23.17 to 125.2   | 0.0036 **          |
| GRK3-D110A vs. GRK3-D110A,R587Q           | 49.37      | -5.754 to 104.5  | 0.0893 ns          |
| GRK3-R587Q vs. GRK3-D110A,R587Q           | -24.84     | -79.95 to 30.28  | 0.6352 ns          |
|                                           |            |                  |                    |
| EV vs. GRK3-CAAX                          | -77.48     | -123.4 to -31.53 | 0.0011 **          |
| EV vs. GRK3-D110A-CAAX                    | -61.54     | -107.5 to -15.59 | 0.0074 **          |
| EV vs. GRK3-R587Q-CAAX                    | -48.05     | -97.68 to 1.586  | 0.0596 ns          |
| EV vs. GRK3-D110A,R587Q-CAAX              | -21.72     | -71.35 to 27.92  | 0.6512 ns          |
| GRK3-CAAX vs. GRK3-D110A-CAAX             | 15.94      | -30.01 to 61.89  | 0.8074 ns          |
| GRK3-CAAX vs. GRK3-R587Q-CAAX             | 29.44      | -20.2 to 79.07   | 0.3799 ns          |
| GRK3-CAAX vs. GRK3-D110A,R587Q-CAAX       | 55.77      | 6.133 to 105.4   | 0.025 *            |
| GRK3-D110A-CAAX vs. GRK3-R587Q-CAAX       | 13.49      | -36.14 to 63.13  | 0.9078 ns          |
| GRK3-D110A-CAAX vs. GRK3-D110A,R587Q-CAAX | 39.82      | -9.809 to 89.46  | 0.144 ns           |
| GRK3-R587Q-CAAX vs. GRK3-D110A,R587Q-CAAX | 26.33      | -26.73 to 79.39  | 0.5438 ns          |



**Supplementary Table 11:** Detailed statistical results of the analysis of the  $\Delta$  net BRET change in  $\beta$ -arrestin2 recruitment to M5R, mediated by the indicated GRK3 construct in  $\Delta$ Q-GRK cells, are shown as presented in **Figure 3e**, **f**. The  $\Delta$  net BRET changes at 100  $\mu$ M ACh of each condition were compared using one-way ANOVA, followed by a Tukey's test (*ns* not significant; \*  $p < 0.05$ ; \*\*  $p < 0.01$ ; \*\*\*  $p < 0.001$ ; \*\*\*\*  $p < 0.0001$ ). For each condition the mean difference, 95% confidence interval (CI) of the difference, and the adjusted  $p$  value are shown.

| conditions                                | mean diff. | 95% CI of diff.  | adjusted $p$ value |
|-------------------------------------------|------------|------------------|--------------------|
| EV vs. GRK3                               | -98.03     | -129.3 to -66.79 | <0,0001 ****       |
| EV vs. GRK3-D110A                         | -86.07     | -119.0 to -53.19 | <0,0001 ****       |
| EV vs. GRK3-R587Q                         | -41.94     | -74.83 to -9.054 | 0.008 **           |
| EV vs. GRK3-D110A,R587Q                   | -8.129     | -41.02 to 24.76  | 0.9471 ns          |
| GRK3 vs. GRK3-D110A                       | 11.96      | -22.05 to 45.97  | 0.8344 ns          |
| GRK3 vs. GRK3-R587Q                       | 56.09      | 22.08 to 90.10   | 0.0006 ***         |
| GRK3 vs. GRK3-D110A,R587Q                 | 89.91      | 55.90 to 123.9   | <0,0001 ****       |
| GRK3-D110A vs. GRK3-R587Q                 | 44.13      | 8.610 to 79.65   | 0.01 *             |
| GRK3-D110A vs. GRK3-D110A,R587Q           | 77.94      | 42.42 to 113.5   | <0,0001 ****       |
| GRK3-R587Q vs. GRK3-D110A,R587Q           | 33.81      | -1.710 to 69.33  | 0.0674 ns          |
|                                           |            |                  |                    |
| EV vs. GRK3-CAAX                          | -96.81     | -161.8 to -31.86 | 0.0022 **          |
| EV vs. GRK3-D110A-CAAX                    | -114.5     | -179.4 to -49.53 | 0.0004 ***         |
| EV vs. GRK3-R587Q-CAAX                    | -120       | -184.9 to -55.03 | 0.0002 ***         |
| EV vs. GRK3-D110A,R587Q-CAAX              | -72.58     | -137.5 to -7.630 | 0.0243 *           |
| GRK3-CAAX vs. GRK3-D110A-CAAX             | -17.67     | -90.95 to 55.60  | 0.9468 ns          |
| GRK3-CAAX vs. GRK3-R587Q-CAAX             | -23.17     | -96.45 to 50.10  | 0.8708 ns          |
| GRK3-CAAX vs. GRK3-D110A,R587Q-CAAX       | 24.23      | -49.05 to 97.50  | 0.852 ns           |
| GRK3-D110A-CAAX vs. GRK3-R587Q-CAAX       | -5.502     | -78.78 to 67.77  | 0.9994 ns          |
| GRK3-D110A-CAAX vs. GRK3-D110A,R587Q-CAAX | 41.9       | -31.38 to 115.2  | 0.4421 ns          |
| GRK3-R587Q-CAAX vs. GRK3-D110A,R587Q-CAAX | 47.4       | -25.87 to 120.7  | 0.3254 ns          |

**Supplementary Table 12:** Detailed statistical results of the analysis of the  $\Delta$  net BRET change in  $\beta$ -arrestin2 recruitment to b2AR, M2R and M5R, mediated by the indicated GRK3 construct in  $\Delta$ Q-GRK cells, are shown as presented in **Supplementary Figure 7**. The  $\Delta$  net BRET changes at highest ligand concentration of each condition were compared using one-way ANOVA (**Suppl. Fig. 7b, e, h**), followed by a Tukey's test (*ns* not significant; \*  $p < 0.05$ ; \*\*  $p < 0.01$ ; \*\*\*  $p < 0.001$ ; \*\*\*\*  $p < 0.0001$ ). The non-normalized, Halo-corrected mean  $\Delta$  net BRET fold changes before (basal) and after stimulation with highest ligand concentration (stimulated) were compared between the conditions or within one condition (**Suppl. Fig. 7c, f, i**), as indicated. Statistical analysis was performed by two-way ANOVA, followed by a Tukey's or Sidak's test respectively (*ns* not significant; \*  $p < 0.05$ ; \*\*  $p < 0.01$ ; \*\*\*  $p < 0.001$ ; \*\*\*\*  $p < 0.0001$ ). For each condition the mean difference, 95% confidence interval (CI) of the difference, and the adjusted  $p$  value are shown.

### b2AR

Statistical details of Suppl. Fig. 7b

| conditions         | mean diff. | 95% CI of diff.  | adjusted $p$ value |
|--------------------|------------|------------------|--------------------|
| EV vs. GRK3        | -70.23     | -109.4 to -31.04 | 0.0019 **          |
| EV vs. GRK3 CAAX   | -56.22     | -95.41 to -17.04 | 0.0078 **          |
| GRK3 vs. GRK3 CAAX | 14         | -25.18 to 53.19  | 0.5964 ns          |

Statistical details of Suppl. Fig. 7c

comparison of basal and stimulated between conditions

| basal              | mean diff. | 95% CI of diff.   | adjusted $p$ value |
|--------------------|------------|-------------------|--------------------|
| EV vs. GRK3        | -0.05886   | -0.4522 to 0.3345 | 0.9231 ns          |
| EV vs. GRK3 CAAX   | -0.05543   | -0.4488 to 0.3379 | 0.9315 ns          |
| GRK3 vs. GRK3 CAAX | 0.003428   | -0.3899 to 0.3968 | 0.9997 ns          |

| stimulated         | mean diff. | 95% CI of diff.   | adjusted $p$ value |
|--------------------|------------|-------------------|--------------------|
| EV vs. GRK3        | -0.8634    | -1.257 to -0.47   | <0.0001 ****       |
| EV vs. GRK3 CAAX   | -0.6237    | -1.017 to -0.2303 | 0.0021 **          |
| GRK3 vs. GRK3 CAAX | 0.2397     | -0.1537 to 0.6331 | 0.29 ns            |

comparison of basal vs. stimulated within one condition

| conditions | mean diff. | 95% CI of diff.   | adjusted $p$ value |
|------------|------------|-------------------|--------------------|
| EV         | -0.2476    | -0.561 to 0.06585 | 0.1326 ns          |
| GRK3       | -1.052     | -1.366 to -0.7387 | <0.0001 ****       |
| GRK3 CAAX  | -0.8158    | -1.129 to -0.5024 | <0.0001 ****       |

### M2R

Statistical details of Suppl. Fig. 7e

| conditions         | mean diff. | 95% CI of diff.  | adjusted $p$ value |
|--------------------|------------|------------------|--------------------|
| EV vs. GRK3        | -82.13     | -133.1 to -31.2  | 0.0038 **          |
| EV vs. GRK3 CAAX   | -61.49     | -112.4 to -10.56 | 0.0203 *           |
| GRK3 vs. GRK3 CAAX | 20.65      | -30.29 to 71.58  | 0.5198 ns          |

Statistical details of Suppl. Fig. 7f

comparison of basal and stimulated between conditions

| basal              | mean diff. | 95% CI of diff.   | adjusted $p$ value |
|--------------------|------------|-------------------|--------------------|
| EV vs. GRK3        | -0.02757   | -0.4106 to 0.3555 | 0.9816 ns          |
| EV vs. GRK3 CAAX   | 0.1415     | -0.2416 to 0.5245 | 0.6213 ns          |
| GRK3 vs. GRK3 CAAX | 0.169      | -0.214 to 0.5521  | 0.5109 ns          |

| stimulated         | mean diff. | 95% CI of diff.    | adjusted $p$ value |
|--------------------|------------|--------------------|--------------------|
| EV vs. GRK3        | -0.9904    | -1.373 to -0.6073  | <0.0001 ****       |
| EV vs. GRK3 CAAX   | -0.5045    | -0.8875 to -0.1214 | 0.0093 **          |
| GRK3 vs. GRK3 CAAX | 0.4859     | 0.1028 to 0.8689   | 0.0121 *           |

comparison of basal vs. stimulated within one condition

| conditions | mean diff. | 95% CI of diff.    | adjusted $p$ value |
|------------|------------|--------------------|--------------------|
| EV         | -0.2365    | -0.455 to -0.01798 | 0.0341 *           |
| GRK3       | -1.199     | -1.418 to -0.9808  | <0.0001 ****       |
| GRK3 CAAX  | -0.8824    | -1.101 to -0.6639  | <0.0001 ****       |

### M5R

Statistical details of Suppl. Fig. 7h

| conditions         | mean diff. | 95% CI of diff.  | adjusted $p$ value |
|--------------------|------------|------------------|--------------------|
| EV vs. GRK3        | -98.37     | -130.2 to -66.55 | <0.0001 ****       |
| EV vs. GRK3 CAAX   | -50.56     | -89.53 to -11.59 | 0.0121 *           |
| GRK3 vs. GRK3 CAAX | 47.81      | 8.843 to 86.77   | 0.017 *            |

Statistical details of Suppl. Fig. 7i

comparison of basal and stimulated between conditions

| basal              | mean diff. | 95% CI of diff.   | adjusted $p$ value |
|--------------------|------------|-------------------|--------------------|
| EV vs. GRK3        | -0.01621   | -0.4838 to 0.4514 | 0.9959 ns          |
| EV vs. GRK3 CAAX   | -0.322     | -0.8946 to 0.2507 | 0.3547 ns          |
| GRK3 vs. GRK3 CAAX | -0.3058    | -0.8784 to 0.2669 | 0.391 ns           |

| stimulated         | mean diff. | 95% CI of diff.   | adjusted $p$ value |
|--------------------|------------|-------------------|--------------------|
| EV vs. GRK3        | -1.216     | -1.684 to -0.7485 | <0.0001 ****       |
| EV vs. GRK3 CAAX   | -1.117     | -1.69 to -0.5444  | 0.0002 ***         |
| GRK3 vs. GRK3 CAAX | 0.099      | -0.4737 to 0.6717 | 0.9028 ns          |

comparison of basal vs. stimulated within one condition

| conditions | mean diff. | 95% CI of diff.    | adjusted $p$ value |
|------------|------------|--------------------|--------------------|
| EV         | -0.1512    | -0.3849 to 0.08257 | 0.2672 ns          |
| GRK3       | -1.351     | -1.585 to -1.117   | <0.0001 ****       |
| GRK3 CAAX  | -0.9462    | -1.277 to -0.6157  | <0.0001 ****       |

**Supplementary Table 13:** Detailed statistical results of the analysis of the  $\Delta$  net BRET change in  $\beta$ -arrestin2 recruitment to M5R, in presence of the indicated amount of bARK-CT in CRISPR/Cas9 Control cells, are shown as presented in **Figure 4b** and **Supplementary Figure 8**. The  $\Delta$  net BRET changes at 100  $\mu$ M ACh of each condition were compared using one-way ANOVA (**Fig. 4b**), followed by a Tukey's test (*ns* not significant; \*  $p < 0.05$ ; \*\*  $p < 0.01$ ; \*\*\*  $p < 0.001$ ; \*\*\*\*  $p < 0.0001$ ). The non-normalized, Halo-corrected mean  $\Delta$  net BRET fold changes before (basal) and after stimulation with 100  $\mu$ M ACh (stimulated) were compared between the conditions or within one condition, as indicated. Statistical analysis was performed by two-way ANOVA (**Suppl. Fig. 8**), followed by a Tukey's or Sidak's test respectively (*ns* not significant; \*  $p < 0.05$ ; \*\*  $p < 0.01$ ; \*\*\*  $p < 0.001$ ; \*\*\*\*  $p < 0.0001$ ). For each condition the mean difference, 95% confidence interval (CI) of the difference, and the adjusted  $p$  value are shown.

Statistical details of Fig. 4b

| conditions                                | mean diff. | 95% CI of diff. | adjusted $p$ value |
|-------------------------------------------|------------|-----------------|--------------------|
| EV vs. 0.5 $\mu$ g bARK-CT                | 15.9       | -8.519 to 40.33 | 0.2116 ns          |
| EV vs. 1 $\mu$ g bARK-CT                  | 43.84      | 21.23 to 66.45  | 0.0014 **          |
| 0.5 $\mu$ g bARK-CT vs. 1 $\mu$ g bARK-CT | 27.93      | 3.509 to 52.36  | 0.0275 *           |

Statistical details of Suppl. Fig. 8

comparison of basal and stimulated between conditions

| basal                                     | mean diff. | 95% CI of diff.   | adjusted $p$ value |
|-------------------------------------------|------------|-------------------|--------------------|
| EV vs. 0.5 $\mu$ g bARK-CT                | 0.1208     | -0.5849 to 0.8265 | 0.8987 ns          |
| EV vs. 1 $\mu$ g bARK-CT                  | -0.3362    | -0.9896 to 0.3171 | 0.4008 ns          |
| 0.5 $\mu$ g bARK-CT vs. 1 $\mu$ g bARK-CT | -0.457     | -1.163 to 0.2487  | 0.2463 ns          |

| stimulated                                | mean diff. | 95% CI of diff.   | adjusted $p$ value |
|-------------------------------------------|------------|-------------------|--------------------|
| EV vs. 0.5 $\mu$ g bARK-CT                | 0.5567     | -0.149 to 1.262   | 0.1358 ns          |
| EV vs. 1 $\mu$ g bARK-CT                  | -0.01848   | -0.6718 to 0.6349 | 0.9971 ns          |
| 0.5 $\mu$ g bARK-CT vs. 1 $\mu$ g bARK-CT | -0.5752    | -1.281 to 0.1305  | 0.1207 ns          |

comparison of basal vs. stimulated within one condition

| conditions          | mean diff. | 95% CI of diff.   | adjusted $p$ value |
|---------------------|------------|-------------------|--------------------|
| EV                  | -1.582     | -1.962 to -1.201  | <0.0001 ****       |
| 0.5 $\mu$ g bARK-CT | -1.146     | -1.585 to -0.7065 | 0.0002 ***         |
| 1 $\mu$ g bARK-CT   | -1.264     | -1.644 to -0.8835 | <0.0001 ****       |

**Supplementary Table 14:** Detailed statistical results of the analysis of the  $\Delta$  net BRET change in  $\beta$ -arrestin2 recruitment to M5R in CRISPR/Cas9 Control cells, in absence or presence of the indicated amount of FR900359, or in  $\Delta$ Q-GRK cells is shown as presented in **Figure 5** and **Supplementary Figure 9**. The  $\Delta$  net BRET changes at 100  $\mu$ M ACh of each condition were compared using one-way ANOVA (**Fig. 5b, d**), followed by a Tukey's test (*ns* not significant; \*  $p < 0.05$ ; \*\*  $p < 0.01$ ; \*\*\*  $p < 0.001$ ; \*\*\*\*  $p < 0.0001$ ). The non-normalized, Halo-corrected mean  $\Delta$  net BRET fold changes before (basal) and after stimulation with 100  $\mu$ M ACh (stimulated) were compared between the conditions or within one condition, as indicated. Statistical analysis was performed by two-way ANOVA (**Suppl. Fig. 9b, d**), followed by a Tukey's or Sidak's test respectively (*ns* not significant; \*  $p < 0.05$ ; \*\*  $p < 0.01$ ; \*\*\*  $p < 0.001$ ; \*\*\*\*  $p < 0.0001$ ). For each condition the mean difference, 95% confidence interval (CI) of the difference, and the adjusted  $p$  value are shown.

### Direct $\beta$ -arrestin2 recruitment to M5R

Statistical details of Fig. 5b

| conditions                                  | mean diff. | 95% CI of diff. | adjusted $p$ value |
|---------------------------------------------|------------|-----------------|--------------------|
| Control vs. Control + 300nM FR900359        | 85.37      | 49.65 to 121.1  | 0.0008 ***         |
| Control vs. $\Delta$ Q-GRK                  | 94.98      | 59.26 to 130.7  | 0.0004 ***         |
| Control + 300nM FR900359 vs. $\Delta$ Q-GRK | 9.612      | -26.11 to 45.33 | 0.7022 ns          |

Statistical details of Suppl. Fig. 9b

comparison of basal and stimulated between conditions

| basal                                       | mean diff. | 95% CI of diff.   | adjusted $p$ value |
|---------------------------------------------|------------|-------------------|--------------------|
| $\Delta$ Q-GRK vs. Control                  | 0.1783     | -0.6668 to 1.023  | 0.842 ns           |
| $\Delta$ Q-GRK vs. Control + 300nM FR900359 | -0.04951   | -0.8946 to 0.7955 | 0.9866 ns          |
| Control vs. Control + 300nM FR900359        | -0.2278    | -1.073 to 0.6173  | 0.7571 ns          |

| stimulated                                  | mean diff. | 95% CI of diff.   | adjusted $p$ value |
|---------------------------------------------|------------|-------------------|--------------------|
| $\Delta$ Q-GRK vs. Control                  | -1.014     | -1.859 to -0.1691 | 0.0193 *           |
| $\Delta$ Q-GRK vs. Control + 300nM FR900359 | -0.2634    | -1.108 to 0.5817  | 0.6914 ns          |
| Control vs. Control + 300nM FR900359        | 0.7507     | -0.09431 to 1.596 | 0.0838 ns          |

comparison of basal vs. stimulated within one condition

| conditions     | mean diff. | 95% CI of diff.    | adjusted $p$ value |
|----------------|------------|--------------------|--------------------|
| $\Delta$ Q-GRK | -0.2813    | -0.6589 to 0.0963  | 0.1441 ns          |
| Control        | -1.474     | -1.851 to -1.096   | <0.0001 ****       |
| Control + FR   | -0.4952    | -0.8728 to -0.1176 | 0.0153 *           |

### M5R translocation to early endosomes

Statistical details of Fig. 5d

| conditions                                  | mean diff. | 95% CI of diff. | adjusted $p$ value |
|---------------------------------------------|------------|-----------------|--------------------|
| Control vs. Control + 300nM FR900359        | 81.28      | 45.15 to 117.4  | 0.0011 **          |
| Control vs. $\Delta$ Q-GRK                  | 99.57      | 63.44 to 135.7  | 0.0004 ***         |
| Control + 300nM FR900359 vs. $\Delta$ Q-GRK | 18.29      | -17.84 to 54.43 | 0.3339 ns          |

Statistical details of Suppl. Fig. 9d

comparison of basal and stimulated between conditions

| basal                                       | mean diff. | 95% CI of diff.     | adjusted $p$ value |
|---------------------------------------------|------------|---------------------|--------------------|
| $\Delta$ Q-GRK vs. Control                  | 0.01237    | -0.06847 to 0.09321 | 0.9129 ns          |
| $\Delta$ Q-GRK vs. Control + 300nM FR900359 | 0.009443   | -0.07139 to 0.09028 | 0.9481 ns          |
| Control vs. Control + 300nM FR900359        | -0.002927  | -0.08376 to 0.07791 | 0.9949 ns          |

| stimulated                                  | mean diff. | 95% CI of diff.     | adjusted $p$ value |
|---------------------------------------------|------------|---------------------|--------------------|
| $\Delta$ Q-GRK vs. Control                  | -0.06501   | -0.1458 to 0.01583  | 0.1221 ns          |
| $\Delta$ Q-GRK vs. Control + 300nM FR900359 | 0.007912   | -0.07293 to 0.08875 | 0.9632 ns          |
| Control vs. Control + 300nM FR900359        | 0.07292    | -0.007919 to 0.1538 | 0.0787 ns          |

comparison of basal vs. stimulated within one condition

| conditions               | mean diff. | 95% CI of diff.        | adjusted $p$ value |
|--------------------------|------------|------------------------|--------------------|
| $\Delta$ Q-GRK           | -0.01852   | -0.03774 to 0.0007038  | 0.058 ns           |
| Control                  | -0.0959    | -0.1151 to -0.07667    | <0.0001 ****       |
| Control + 300nM FR900359 | -0.02005   | -0.03927 to -0.0008274 | 0.0421 *           |
