# Supplementary material for: GRK specificity and Gβγ dependency determines the potential of a GPCR for arrestin-biased agonism
Source: PubMed Central journal article supplement (PMC11220067; doi:10.1038/s42003-024-06490-1), 2024-07-03
Supplement: 42003_2024_6490_MOESM3_ESM.pdf [file 42003_2024_6490_MOESM3_ESM.pdf]

## Description of Additional Supplementary Files

**File name:** Supplementary Data 1

**Description:** Source data behind Fig.1

**File name:** Supplementary Data 2

**Description:** Source data behind Fig.2

**File name:** Supplementary Data 3

**Description:** Source data behind Fig.3

**File name:** Supplementary Data 4

**Description:** Source data behind Fig.4

**File name:** Supplementary Data 5

**Description:** Source data behind Fig.5
